# 1 **Modeling microbial diversity with metabolic trade-offs**

2 Zhiyuan Li<sup>1,2</sup>, Bo Liu<sup>3</sup>, Sophia Hsin-Jung Li<sup>4</sup>, Christopher G. King<sup>5</sup>, Zemer Gitai<sup>4</sup>, and  
3 Ned S. Wingreen<sup>\*4,6</sup>

4

5 <sup>1</sup>. Center for the Physics of Biological Function, Princeton University.

6 <sup>2</sup>. Princeton Center for Theoretical Science, Princeton University.

7 <sup>3</sup>. Yuanpei College, Peking University, Beijing, China.

8 <sup>4</sup>. Department of Molecular Biology, Princeton University.

9 <sup>5</sup>. Department of Physics, Princeton University.

10 <sup>6</sup>. Lewis-Sigler Institute for Integrative Genomics, Princeton University, Princeton, NJ, USA

11 **ABSTRACT**

12

13 **Nature exhibits much higher biodiversity than predicted by theories of**  
14 **competition. One solution for reconciling this “paradox of the plankton” is to**  
15 **imposes metabolic trade-offs, where species need to allocate limited cellular**  
16 **resources into multiple functions. However, two questions exist for metabolic**  
17 **models: first, as many such models have been proposed with diverse**  
18 **assumptions and different results, can we find a universal language to summarize**  
19 **various models into one unified framework? Second, under the pressure of**  
20 **evolution, will there be a single optimal metabolic strategy that finally dominates**  
21 **over all others? In this work, we address these two questions by constructing a**  
22 **generalizable framework to describe the species-environment feedback in**  
23 **chemostat-type resource-competition models. Employing this framework, a**  
24 **fitness landscape based on the strategy-growth rate relationship can be**  
25 **constructed. Species are capable of creating their own fitness landscape by**  
26 **shaping their nutrient environment, which allows for dynamic fitness landscapes**  
27 **and rich ecological behaviors, and is crucial for biodiversity in all the models we**  
28 **examined. A non-invasible strategy corresponds to a species creating a fitness**  
29 **landscape that places itself at the top. Under certain conditions, more than one**  
30 **species is required to complete this task, which leads to evolutionarily stable**  
31 **coexistence. Our approach facilitates quantitative understanding of chemostat**  
32 **experiments, and provides insight into the competitive-exclusion paradox.**

## 33 INTRODUCTION

34 In the natural world, species are in constant competition. So why doesn't the fittest  
35 species outcompete the others and become the sole survivor? This question, captured  
36 by the "paradox of the plankton" (Hutchinson, 1961), has perplexed community  
37 ecologists for nearly a century. On the basis of simple resource-competition models, it  
38 has been argued that the number of stably coexisting species cannot exceed the  
39 number of resources, leading to the so-called competitive exclusion principle  
40 (Armstrong & McGehee, 1980; Hardin, 1960; Levin, 1970; McGehee & Armstrong,  
41 1977). Nevertheless, tremendous biodiversity manifests in the real world, from  
42 environmental surveys to controlled lab experiments (Friedman, Higgins, & Gore, 2017;  
43 Goldford et al., 2018; Maharjan, Seeto, Notley-McRobb, & Ferenci, 2006). Even in well-  
44 mixed aquatic environments, hundreds of species of phytoplankton coexist on a few  
45 types of abiotic nutrients (Cermeño, Teixeira, Branco, Figueiras, & Marañón, 2014;  
46 Moore et al., 2013).

47  
48 A multitude of hypotheses have been proposed to circumvent the competitive exclusion  
49 principle (Palmer, 1994; Roy & Chattopadhyay, 2007; Scheffer, Rinaldi, Huisman, &  
50 Weissing, 2003). Some introduce additional factors such as cooperative or antagonistic  
51 interactions between species (Bailey, Kelsic, & Kishony, 2016; Freilich et al., 2011;  
52 Kerr, Riley, Feldman, & Bohannan, 2002; Murdoch & Oaten, 1975; Venturelli et al.,  
53 2018; Wintermute & Silver, 2010), spatially structured habitats (Amarasekare, 2003;  
54 Geyrhofer & Brenner, 2018; Huisman, van Oostveen, & Weissing, 1999; D. Tilman,  
55 1994), temporal fluctuations of the environment (Amarasekare, 2003; Behar, Brenner, &  
56 Louzoun, 2014; Descamps-Julien & Gonzalez, 2005; Huisman et al., 1999; D. Tilman,  
57 1994), or complex life-histories of species (Huisman, Johansson, Folmer, & Weissing,  
58 2001). Even in spatially homogeneous models with constant nutrient supply and without  
59 direct species interactions, rich dynamics have been uncovered under various  
60 conditions. In a model where species compete for essential resources, different nutrient  
61 requirements can produce intrinsically oscillatory or even chaotic dynamics that allows  
62 for increased diversity (Huisman & Weissing, 1999, 2001). Alternatively, cross-feeding  
63 (Goldford et al., 2018; Pfeiffer & Bonhoeffer, 2004), preferential nutrient utilization (A.  
64 Goyal, Dubinkina, & Maslov, 2018), or trade-offs (Beardmore, Gudelj, Lipson, & Hurst,  
65 2011; Taillefumier, Posfai, Meir, & Wingreen, 2017) can promote stable coexistence.  
66 Recently, a simple model with a trade-off in nutrient uptake, was shown to self-organize  
67 to a state of unlimited coexistence (Posfai, Taillefumier, & Wingreen, 2017). This large  
68 variety of models and the richness of possible behaviors raises the question of  
69 unification: is there a simple framework that consolidates this diverse group of models  
70 into one easily understandable picture?

71  
72 A key challenge to producing such a framework is that fitness landscapes are not static.  
73 Not only can extrinsic environmental factors fluctuate in space and time (Mustonen &  
74 Lässig, 2009), but species can also actively reshape their habitats (Laland, Matthews, &  
75 Feldman, 2016; Leibold, 1995; Odling-Smee, Laland, & Feldman, 2003). The feedback  
76 loop between species and their environment produces an intrinsically dynamic fitness  
77 landscape in which the action of one species can influence the fitness of all species. A

78 profound example is the Great Oxygenation Event, when cyanobacteria created an  
79 oxygen-rich atmosphere (Kasting & Siefert, 2002), causing a massive extinction of  
80 anaerobic bacteria but also stimulating an explosion of biodiversity (Schirmer, de  
81 Vos, Antonelli, & Bagheri, 2013). Today, species continue shaping their habitats on all  
82 scales: from humans inducing the sixth mass extinction (Ceballos et al., 2015) to  
83 microbes consuming nutrients, releasing wastes, and producing toxins (Callahan,  
84 Fukami, & Fisher, 2014).

85  
86 Resource-competition models provide a simple context to explore the interaction  
87 between species and their environment (Smith & Waltman, 1995). In such models,  
88 species interact only indirectly, via consumption (and sometimes production) of a  
89 common pool of nutrients. A steady state can be reached if the species present can  
90 shape the nutrient concentration to support a growth rate equal to their dilution or death  
91 rate (David Tilman, 1982). Resource-competition models underpin many ecosystem  
92 theories including contemporary niche theory as pioneered by MacArthur (MacArthur,  
93 1970), popularized by Tilman (David Tilman, 1980, 1982), and extended by Chase and  
94 Leibold (Chase & Leibold, 2003). A central component of contemporary niche theory is  
95 a graphical approach, generally consisting of three components: zero net growth  
96 isoclines (ZNGIs) in nutrient space, an impact vector representing a species' nutrient  
97 consumption, and a supply point to describe the external resource supply (Koffel,  
98 Daufresne, Massol, & Klausmeier, 2016). This graphical approach is a powerful and  
99 intuitive way of evaluating the outcome of competition and community assembly, but  
100 has not been commonly utilized to understand models of coexistence (Letten, Ke, &  
101 Fukami, 2017), especially coexistence beyond the limit of competitive exclusion  
102 (Huisman & Weissing, 1999; Posfai et al., 2017).

103  
104 In this work, we utilize and extend the graphical tools of resource-competition theory to  
105 relate and unify multiple models for microbial diversity, emphasizing the consequences  
106 of species creating their own environment. The nutrient environment shaped by one  
107 species through growth and consumption may be inviting or prohibiting to another  
108 species. We represent this species-environment interplay via an intuitive geometric  
109 visualization of a "rule of invasion". Under various model assumptions, the species-  
110 environment feedback allows intransitivity of fitness, in which there is no strict  
111 competition hierarchy and therefore no single best species or group of species  
112 (Soliveres et al., 2015). We demonstrate how such intransitivity can lead to rich  
113 ecosystem dynamics, including mutual invasion, multistability, and oscillations, and how  
114 all of these behaviors can be simply related via our graphical representation combined  
115 with the rule of invasion.

116  
117 We extend our investigation of coexistence to encompass evolution. As species evolve  
118 to adapt to their environment, an ongoing threat to diversity is that mutation/selection  
119 may produce a supreme winner that takes over the habitat. To quantify the impact of  
120 evolution on biodiversity, we focus on models with metabolic trade-offs: with limited  
121 cellular resources, the growth rate of cells cannot increase without bound. Rather  
122 evolution optimizes over cells' internal resource allocation strategies (S. Goyal, Yuan,  
123 Chen, Rabinowitz, & Wingreen, 2010; Liebermeister et al., 2014). Different metabolic

124 strategies lead to different growth rates in different environments, driving a dynamic  
125 fitness landscape. From the perspective of species-environment feedback, we can  
126 define non-invasible/optimal metabolic strategies – namely, one or more species that  
127 construct a fitness landscape which places themselves on the top. When multiple  
128 species are indispensable in co-creating such an environment, their coexistence  
129 becomes evolutionarily stable.

## 130 RESULTS

### 131 ***Nutrient limitations, resource allocation strategies, and the chemostat***

132  
133 The growth of microbes is limited by the availability of external nutrients and by their  
134 own internal resources, including proteins and energy. Facing different stringencies,  
135 cells need to adjust the allocation of their limited internal resources toward a variety of  
136 cellular functions (nutrient import and assimilation, energy production, reproduction,  
137 maintenance, etc.) to achieve efficient growth. For example, in *E. coli* a large fraction of  
138 cellular resources is allocated to synthesize ribosomes, which is reflected in the RNA-to-  
139 Protein ratio (RP ratio). In a previous work, we used chemostats (Fig 1A) to  
140 quantitatively control growth rate and nutrient supply and showed that the RP ratio in *E.*  
141 *coli* is significantly lower under Phosphorus (P)-limitation than under Carbon (C)- or  
142 Nitrogen (N)-limitation at the same growth rates (Li et al., 2018), indicating cells adopt  
143 different proteome allocation strategies in response to different nutrient limitations. This  
144 observation raised further questions: How can we achieve fine control of nutrient  
145 limitation? Is the limiting nutrient determined by the absolute concentrations of supplied  
146 nutrients, or the relative abundance of one nutrient compared to the others?

147  
148 To answer these questions, we ran chemostats at multiple growth rates and supply  
149 conditions, using RP ratio as a metric for P or C/N limitation. We started from a supply  
150 designed for P-limitation, i.e. with carbon and nitrogen supplied in excess, then kept the  
151 phosphate concentration in the supply unchanged but decreased the nitrogen  
152 concentration. If the nutrient limitation is controlled by the absolute concentration in the  
153 supply, cells should retain their RP ratio regardless of nitrogen supply. However, we  
154 observed that as the concentration of supplied nitrogen decreased, the RP ratios at all  
155 measured growth rates shifted up, from values reflecting P-limitation to values more  
156 characteristic of N-limitation, even though the supply of phosphorus remained at the  
157 initial “limiting” concentration (Fig 1B). Similar results were obtained for Carbon  
158 limitation (Fig 1C), where the RP-ratio curve was shifted to values resembling C-  
159 limitation over a series of dilutions of the carbon supply starting from P-limitation. These  
160 observed shifts of RP ratios indicate that nutrient limitation in a chemostat depends on  
161 the relative difference between supplied nutrients, rather than on the absolute  
162 concentration of any single supplied nutrient. Also, these observations highlight that  
163 non-intuitive behaviors can occur even in a system as simple as chemostat, highlighting  
164 the need for quantitative modeling.

165  
166 The convergence towards steady state makes the chemostat an ideal experimental  
167 system to culture microorganisms and investigate their physiology with a constant  
168 environment and growth rate (Wides & Milo, 2018; Ziv, Brandt, & Gresham, 2013).  
169 Despite its simplicity, the chemostat captures an important property of ecosystems,  
170 namely that species create their own environment. For these reasons, many resource-  
171 competition models are based on chemostat-type dynamics. In the following sections,  
172 we present graphical representations that facilitate the interpretation of chemostat  
173 models and experiments, and provide intuitive understanding of a variety of resource-  
174 competition models via the lens of species-environment feedback.

175

176

### 177 **A graphical representation of a chemostat model**

178 In an idealized model of a chemostat (Fig 1A),  $p$  types of nutrients are supplied at rate  $d$   
179 and concentrations  $\vec{c}_{\text{supply}} = (c_{1, \text{supply}}, c_{2, \text{supply}}, \dots, c_{p, \text{supply}})$ , meanwhile cells and medium  
180 are diluted at the same rate  $d$ . However, the environment that directly impacts cells is  
181 the nutrient concentration inside the chemostat,  $\vec{c} = (c_1, c_2, \dots, c_p)$ , which influences the  
182 intracellular metabolite concentrations  $\vec{q}$  and the growth rate  $g$  of each species.  
183 Accordingly, the biomass density  $m$  of each species in the chemostat obeys:

$$\frac{dm}{dt} = m \cdot (g(\vec{c}, \vec{q}) - d). \quad (1)$$

184 The concentration  $c_i$  of the  $i$ -th nutrient is a variable, influenced by its rate of  
185 consumption by cells. For a single species with import rate  $I_i$  per cell volume, the  
186 concentration  $c_i$  satisfies

$$\frac{dc_i}{dt} = d \cdot (c_{i, \text{supply}} - c_i) - \frac{m}{r} \cdot I_i(\vec{c}, \vec{q}), \quad (2)$$

187 where  $r$  is a constant representing the biomass per cell volume. (If the volume of the  
188 chemostat is  $V_{\text{chemostat}}$  and the total volume of cells is  $V_{\text{cells}}$ , the import flux of the  $i$ -th  
189 nutrient  $V_{\text{cells}} \cdot I_i$  implies a rate of change of concentration inside cells of  $I_i$  and a  
190 corresponding rate of change of the concentration in the chemostat of  $V_{\text{cells}} / V_{\text{chemostat}} \cdot$   
191  $I_i = (m \cdot V_{\text{chemostat}} / r) / V_{\text{chemostat}} \cdot I_i = m / r \cdot I_i$ )

192

193

194 In this manuscript, we define  $\vec{c}$  as the “nutrient environment”, and all possible values of  
195  $\vec{c}$  constitute the “nutrient space”. Within a cell, the concentration of metabolites is  
196 influenced by intake rate, and influences the growth rate. Different metabolic models  
197 assume different forms for such influences, and we use  $\vec{f}(\vec{I}(\vec{c}, q), \vec{q})$  to represent the  
198 rate of change of  $\vec{q}$ :

$$\frac{d\vec{q}}{dt} = \vec{f}(\vec{I}(\vec{c}, \vec{q}), \vec{q}). \quad (3)$$

199

200 Eqs. (1)-(3) represent a chemostat model in general. The simplicity of the chemostat  
201 has inspired many theoretical studies of resource competition, and different model  
202 assumptions about how species grow and consume nutrients have produced a variety  
203 of intriguing behaviors and conclusions. However, the origins of these differences are  
204 not always simple to discern. To provide a unified view, we present a graphical  
205 representation that allows ready visualization of the rich behaviors that emerge from the  
206 feedback between species and the environment in a chemostat.

207

208 We focus on steady-state behavior, where Eq. (3) is equal to zero and  $\vec{q}$  can be solved  
209 for as a function of  $\vec{c}$ , reducing  $g(\vec{c}, \vec{q})$  and  $I_i(\vec{c}, \vec{q})$  to functions fully dependent on  $\vec{c}$ ,  
210 namely  $g(\vec{c})$  and  $I_i(\vec{c})$ . A graphical representation of the steady state created by a  
211 single species consists of three components (details in Methods):

212



- 213 1. *The growth contour* reflects how the nutrient environment determines cell growth. The  
214 growth-rate function  $g(\vec{c})$  maps different points in nutrient space onto growth rates  
215 (background color in Fig 1D). At steady state, the relation  $dm/dt = 0$  (Eq. (1) ) requires  
216 the growth rate to be exactly equal to the dilution rate (assuming nonzero cell density).  
217 Therefore, the contour in nutrient space satisfying  $g(\vec{c}) = d$  indicates all possible  
218 environments that could support the steady state of the species (red curve in Fig 1D).  
219
- 220 2. *The flux-balance curve and the supply line* reflect how cells shape the nutrient  
221 environment for a given supply condition. At steady state, nutrient influx, dilution, and  
222 consumption need to be balanced such that  $dc_i/dt = 0$  in Eq. (2). Flux balance can be  
223 expressed in two ways, depending on whether the unknown is the nutrient environment  
224 or the supply condition: First, given a supply condition, different values of cell density  $m$   
225 lead to different steady-state nutrient concentrations (Eq. (S5)), constituting a one-  
226 dimensional “flux-balance curve” in nutrient space (purple, cyan, and blue curves in Fig  
227 1D). Alternatively, given a specified steady-state nutrient concentration, different values  
228 of cell density  $m$  lead to a straight line in the space of supply conditions, which we call  
229 the “supply line” (see Methods for details). Despite the fact that the supply space and  
230 the nutrient space are distinct, they share the same units of concentration in each  
231 dimension. Therefore, for ease of visualize we typically show supply lines along with  
232 other features in the nutrient space (Eq. (S6), black dashed line in Fig 1D).  
233
- 234 3. *The steady-state nutrient environment*  $\vec{c}_{ss}$  created by the species is the intersection of  
235 the growth contour and the flux-balance curve (Fig 1D, red dot). Due to consumption by  
236 the cells,  $\vec{c}_{ss}$  is less than  $\vec{c}_{supply}$  for all nutrients.

### 237 238 **Subtleties in the control of nutrient limitation**

239 The ability of cells to create their own nutrient environment brings complexity to  
240 chemostat experiments. In this section, we present two examples of subtleties in the  
241 control of nutrient limitation, and show how a graphical representation can assist in  
242 interpreting the experiments.

243  
244 First, as all the  $\vec{c}_{supply}$  on one supply line correspond to a single steady-state  $\vec{c}_{ss}$ , the  
245 resulting nutrient limitation in a chemostat depends on the difference between nutrient  
246 supplies, not on the absolute concentration of any single supplied nutrient. Different  
247 supply conditions (such as the purple, cyan, and blue open circles in Fig 1D), as long as  
248 they fall on the same supply line, can lead to identical steady-state nutrient  
249 environments (red dot in Fig 1D). Therefore, these supply conditions will lead to  
250 identical nutrient limitations and thus the same cellular response. This phenomenon is  
251 distinct from ratio-sensing, in which cells process dissimilar environmental inputs into  
252 similar responses (Escalante-Chong et al., 2015; Wang & Tang, 2017). The graphical  
253 result that the steady-state nutrient concentration and thus the nutrient limitation  
254 depends on the relative supply of different nutrients is consistent with our experimental  
255 observation (Fig 1B and C) that decreasing the nitrogen or carbon supply from a P-  
256 limited condition induces a similar proteome allocation as that induced by an N/C-limited  
257 supply with P in excess.

258



259 Interestingly, changing the dilution rate  $d$  alone has the potential to switch the limiting  
260 nutrient. As shown in Fig 1E, if the supply concentrations (blue open circle) are chosen  
261 to produce the blue flux-balance curve, this curve intersects with the yellow, orange,  
262 and deep red growth contours on the horizontal, horizontal, and vertical edges,  
263 respectively. Therefore, as the dilution rate and growth rate increase, the species will  
264 transition from nutrient  $b$ -limited to nutrient  $a$ -limited growth, even though the supply  
265 concentrations  $\vec{c}_{\text{supply}}$  are kept unchanged.

266

### 267 **Metabolic trade-off and strategies**

268 As demonstrated by our R/P ratio measurements of *E. coli*, microorganisms allocate  
269 their limited internal resources according to the nutrient environment they perceive. In  
270 our models, We use  $\alpha_j$  to denote the fraction of internal resources allocated to the  $j$ -th  
271 cellular function, with  $\vec{\alpha} = (\alpha_1, \alpha_2 \dots)$  representing a metabolic strategy. An exact  
272 metabolic trade-off is assumed, such that  $\sum_j \alpha_j = 1$ . For example, Figure 2A shows a  
273 simple metabolic model with two substitutable nutrients  $a$  and  $b$ , such as glucose and  
274 galactose (see Methods for details), that contribute linearly to biomass increase. Since a  
275 substantial investment of protein and energy is required for nutrient intake, the model  
276 assumes a trade-off between the allocation of internal resources to import either  
277 nutrient. Specifically, a fraction  $\alpha_a$  of resources is allocated to import  $a$  and a fraction  $\alpha_b$   
278 ( $= 1 - \alpha_a$ ) to import  $b$ . All values of  $\alpha_a$  from 0 to 1 define a continuous spectrum of  
279 metabolic strategies. How then shall we evaluate these strategies given that a single  
280 species adopting any one of these strategies will grow at exactly the same rate as  
281 dilution in a steady-state chemostat?

282

### 283 **Rule of invasion**

284 We use the outcome of competition between species to evaluate metabolic strategies,  
285 assuming each species adopts a given strategy. In particular, we focus on invasion: the  
286 introduction of a small number of an “invader” species to a steady-state chemostat  
287 already occupied by an “indigenous” species.

288

289 In the graphical representation of species-environment interaction, the outcome of an  
290 invasion can be summed up by a simple geometric rule, as demonstrated in Fig 2B and  
291 C. The growth contour of the invader (species *Red*) separate the nutrient space into  
292 two regions: an “invasion zone” where the invader grows faster than dilution (green-  
293 colored region in Fig 2B and C), and “no-invasion zone” where the invader has a growth  
294 rate lower than dilution. If the steady-state environment constructed by the indigenous  
295 species (species *Blue*) is located within the invasion zone of the invader, the invader will  
296 initially grow faster than dilution. Therefore, the invader will expand its population and  
297 the invasion will be successful (Fig 2B). By contrast, if the steady-state nutrient  
298 environment created by the indigenous species lies outside of the invasion zone, the  
299 invasion will be unsuccessful (Fig 2C, same species but different supply condition  
300 therefore different steady state). (See Methods for details.)

301

### 302 **Mutual invasion, flat fitness landscape, and unlimited coexistence**

303 Such a rule of invasion does not guarantee transitivity of competitiveness. That is, if  
304 species *Red* can invade species *Blue*, that does not mean *Blue* cannot invade *Red*.

305 Figure 2D shows an example of mutual invasibility. With a supply condition different  
306 from those in Fig 2B and C, while the steady-state environment created by *Blue* is  
307 located within the invasion zone of *Red*, the steady-state environment created by *Red* is  
308 also located within the invasion zone of *Blue*. According to the rule of invasion, each  
309 species can therefore invade the steady-state environment created by the other. In the  
310 face of such successful invasions, the only possible stable nutrient environment for this  
311 system is at the intersection of two growth contours, where the two species can coexist.

312  
313 This mutual invasion can be readily understood within a “fitness-landscape” picture.  
314 Given an environment, we define the fitness landscape as the relation between the  
315 instantaneous growth rate and the metabolic strategy of any invader (Eq. (S8)-(S9), see  
316 Methods for details). Different environments give rise to different fitness landscapes. In  
317 the steady-state environment created by *Red* ( $\alpha_a = 0.6$ ), strategies with smaller  $\alpha_a$  have  
318 higher fitness (Fig 2D, upper inset, red curve). In the steady-state environment created  
319 by *Blue* ( $\alpha_a = 0.2$ ), strategies with larger  $\alpha_a$  have higher fitness (Fig 2D, upper inset,  
320 blue curve). Therefore, each species creates an environment that is more suitable for its  
321 competitor, which leads to coexistence.

322  
323 For the environment co-created by *Blue* and *Red* (Fig 2D, purple dot), the fitness  
324 landscape becomes flat (Fig 2D, upper inset, purple curve): species with any metabolic  
325 strategy will grow at the same rate as dilution in this environment. Therefore, in this  
326 system, once a pair of species with a mutual-invasion relationship construct the nutrient  
327 environment together, all species become neutral and can coexist indefinitely (see  
328 Methods for details). This graphical approach to mutual invasion and the flat fitness  
329 landscape provide an intuitive representation of species self-organizing to a state of  
330 unlimited coexistence beyond competitive exclusion, as first reported by Posfai et al.  
331 (Posfai et al., 2017).

### 332 333 **Rock-paper-scissor invasion loop and oscillation**

334 Resource-competition models focusing on various aspects of cellular metabolism vary  
335 in their assumptions regarding  $g(\vec{c}, \vec{x}, \vec{\alpha})$ ,  $I(\vec{c}, \vec{x}, \vec{\alpha})$ , and  $f(\vec{c}, \vec{x}, \vec{\alpha})$ , and can lead to  
336 diverse results for community structure and coexistence. However, the above general  
337 “rule of invasion” allows us to treat these divergent resource-competition models in a  
338 unified framework. In the following example, we utilized a metabolic model slightly  
339 different from that in Fig 2, to show that a dynamic fitness landscape is indispensable  
340 for coexistence.

341  
342 In the metabolic model shown in Fig 3A, three substitutable nutrients,  $a$ ,  $b$ , and  $c$ ,  
343 contribute additively to cell growth. In this three-dimensional nutrient space, the growth  
344 contour for each species is a two-dimensional surface (Fig 3B). In addition to requiring  
345 enzymes to import the raw forms of these nutrients as in the model of Fig 2A, enzymes  
346 are also required to convert the imported raw materials into biomass. In this model, a  
347 six-element  $\vec{\alpha}$  is required to describe the metabolic strategy, and there is the possibility  
348 of “mismatches” in the fraction of internal resources allocated to import and to convert  
349 the same nutrient. Such mismatches can produce a “rock-paper-scissor” invasion loop  
350 (Fig S1A): In the environment created by species 1, species 2 has a higher fitness but

351 not species 3; therefore species 2 can invade species 1 and establish its own  
352 environment; however, this environment lies within the invasion zone of species 3 (Fig  
353 3B) but not of species 1, therefore species 3 subsequently invades; then in turn, species  
354 3 create an environment where species 1 has the highest fitness. Such a loop of  
355 invasions leads to oscillatory population dynamics (Fig 3C, upper panel), with an ever-  
356 changing fitness landscape (Fig 3C, lower panel).

357  
358 Oscillation and even chaos in resource-competition model have been demonstrated by  
359 Huisman et al. (Huisman et al., 1999), and shown to allow dynamical coexistence  
360 beyond competitive exclusion. The simple model presented here illustrates how  
361 oscillation can be understood as a loop of invasion creating an ever-changing fitness  
362 landscape.

### 363 364 **Multi-stability, chain of invasion, and non-invasible strategies**

365 When species create environments that are more favorable for their competitors,  
366 mutual-invasion and oscillations can occur. Can species create environments that are  
367 hostile to their competitors, and if so what will be the consequences?

368 Fig 4A shows a simple metabolic model with two essential nutrients  $a$  and  $b$ , such as  
369 nitrogen and phosphorus (see Methods for details). Similar to the model in Fig 2A, the  
370 model assumes a trade-off between the allocation of internal resources to import  
371 nutrients, so that a resource allocation strategy is fully characterized by the fraction of  
372 resources  $\alpha_a$  allocated to import nutrient  $a$ . The growth rate is taken to be the minimum  
373 of the two input rates (Odum & Barrett, 1971). As shown in Fig 4B, two species, *Red*  
374 and *Blue*, each creates a nutrient environment outside of the invasion zone of each  
375 other. According to the rule of invasion, neither can be invaded by the other. Therefore,  
376 the steady state of the community depends on initial conditions – whichever species  
377 occupies the chemostat first will dominate indefinitely.

378  
379 From the perspective of the strategy-growth relationship (Fig 4B, inset), species *Red*  
380 ( $\alpha_a = 0.65$ ) creates a fitness landscape where small  $\alpha_a$  is disfavored. Symmetrically,  
381 species *Blue* ( $\alpha_a = 0.35$ ) creates a fitness landscape where large  $\alpha_a$  is disfavored.  
382 However, neither *Red* nor *Blue* sits on the top of the fitness landscape each one creates  
383 (Fig 4C). In the fitness landscape created by *Blue*, a slightly larger  $\alpha_a$  (green diamond in  
384 Fig 4C) has the highest growth rate. Consequently, species adopting the *Green* strategy  
385 can invade *Blue*. Nevertheless, species *Green* is not on the top of its own fitness  
386 landscape as an even larger  $\alpha_a$  (yellow diamond in Fig 4C) maximizes the growth rate  
387 in the environment created by *Green*. A series of replacements by the fastest-growing  
388 species in the environment created by the former species creates a chain of invasion.

389  
390 It is worth noting that in this model after four steps of replacement, bistability appears.  
391 The species with  $\alpha_a$  marked by *Deep Purple*, which is reached by the chain of invasion  
392 going from *Blue*, to *Green*, to *Yellow*, to *Deep Green*, cannot invade the original species  
393 *Blue*. A similar relationship holds between *Cyan* and *Red*. This phenomenon highlights  
394 the difference between ecological stability and evolutionary stability: Ecologically, as  
395 both *Blue* and *Deep Purple* create a fitness landscape where the other species grows  
396 slower than dilution, they constitute a bistable system. However, evolutionarily, mutants

397 with slightly larger  $\alpha_a$  can invade *Blue*, bringing the system towards *Deep Purple* until  
398 bistability collapses.

399

400 In this model, with symmetric parameters, the only evolutionarily stable strategy is  $\alpha_a =$   
401 0.5 (black diamond in Fig 4C). This is the only strategy that locates itself on the top of  
402 the fitness landscape it creates, and therefore cannot be invaded by any other species.  
403 This simple model demonstrates a general definition of evolutionarily stable (aka  
404 optimal or non-invasible) strategies: those strategies that create a fitness landscape  
405 which places themselves on the top (Eq. (S10)).

406

407 A nutrient environment defines a fitness landscape, and the steady-state nutrient  
408 environment created by species is influenced by supply condition, dilution rate, and cell  
409 metabolism. Therefore, different chemostat parameters and different metabolic models  
410 lead to different optimal strategies. In the following, we described a generally applicable  
411 protocol for obtaining the non-invasible strategies, using the metabolic model in Fig 4A  
412 as the example (Fig 4D, details in Methods):

413 First, under a nutrient environment  $\vec{c}$ , the maximal growth rate  $g_{\max}(\vec{c})$  (background  
414 color in Fig 4D) and the corresponding resource allocation strategy  $\vec{\alpha}_{\max}(\vec{c})$  can be  
415 obtained analytically or via numerical search through the strategy space (Eq. (S11)).

416  $g_{\max}(\vec{c})$  and  $\vec{\alpha}_{\max}(\vec{c})$  are independent of the chemostat parameters  $\vec{c}_{\text{supply}}$  and  $d$ .

417 Second, the maximal growth contour for dilution rate  $d$  is defined as all nutrient  
418 environments  $\vec{c}$  that support a maximal growth rate of  $d$  (Eq. (S12)). Different  
419 maximizing strategies  $\vec{\alpha}_{\max}(\vec{c})$  exist at different points of the maximal growth contour, as  
420 shown by the colors of the curve in Fig 4D. By definition, the maximal growth contour  
421 envelops the growth contour of any single strategy, and nutrient environments on the  
422 maximal growth contour are outside of the invasion zone of any strategy. Therefore, if a  
423 species is able to create a steady-state environment on the maximal growth contour, it  
424 cannot be invaded. Finally, different  $\vec{c}_{\text{supply}}$  form different maximal flux-balance curves  
425 (Eq. (S14)), which intersect with the maximal growth contour at one point  $\vec{c}_{\text{opt}}$ . Species  
426  $\vec{\alpha}_{\max}(\vec{c}_{\text{opt}})$  that adopt the maximizing strategy at  $\vec{c}_{\text{opt}}$  create the environment  $\vec{c}_{\text{opt}}$ , and  
427 are therefore immune to invasion. Under different  $\vec{c}_{\text{supply}}$ , different species become  
428 non-invasible (orange, green, and blue growth contours in Fig 4D), and the supply lines  
429 emanating from different points on the maximal growth contour indicate the supply  
430 conditions for which the corresponding strategies are evolutionarily stable.

431

### 432 **Evolutionarily stable coexistence**

433 Given  $d$  and  $\vec{c}_{\text{supply}}$ , the maximal growth contour and the maximal flux-balance curve  
434 are unique, therefore there is only one  $\vec{c}_{\text{opt}}$ . Does the uniqueness of  $\vec{c}_{\text{opt}}$  imply a single  
435 evolutionarily stable species? Or is coexistence still possible even in the face of  
436 evolution? In a recent work (Taillefumier et al., 2017), this question was addressed by  
437 modeling a population of microbes competing for steadily supplied resources. Though  
438 *in-silico* evolution and network analysis, the authors found that multiple species with  
439 distinct metabolic strategies can coexist as evolutionarily-stable co-optimal consortia,  
440 which no other species can invade.

441



442 Using a simplified version of Taillefumier et al.'s model (Fig 5A), we employ the  
443 graphical approach to help identify the requirements for such evolutionarily-stable  
444 coexistence and the role of each species in supporting the consortium. In this model, at  
445 the cost of producing the necessary enzymes, cells are not only able to import external  
446 nutrients, but can also convert any one of the internal nutrients into any other.  
447 Meanwhile, nutrients passively diffuse in and out of the cell. The internal concentrations  
448 of nutrient *a* and nutrient *b* are both essential for cell growth (see Methods for detail).  
449 Therefore, metabolic trade-offs in this system have four elements: the fraction of internal  
450 resources allocated to import nutrient *a* ( $\alpha_a$ ) or nutrient *b* ( $\alpha_b$ ) and/or convert one  
451 nutrient into another ( $\alpha_{ab}$  converts internal *b* into *a*, and  $\alpha_{ba}$  converts internal *a* into *b*).  
452 Each species is defined by its internal resource allocation strategy  $\vec{\alpha} = (\alpha_a, \alpha_b, \alpha_{ab}, \alpha_{ba})$ .  
453

454 Following the general protocol described in the previous section, we first identified the  
455 maximal growth rates  $g_{\max}(\vec{c})$  and the corresponding strategy or strategies  $\vec{\alpha}_{\max}(\vec{c})$  at  
456 each point  $\vec{c}$  in the nutrient space, and generated maximal growth contours for different  
457 dilution rates (Fig 5B). The maximal growth contours are not smoothly continuous, nor  
458 are the corresponding strategies. In nutrient space, three distinct sectors of maximizing  
459 strategies appear (Fig 5B, Fig S3A): When nutrient *a* is very low compared to *b*, the  
460 maximizing strategy is a “*b*-*a* converter” which imports *b* and converts it into *a* (blue  
461 sector, only  $\alpha_b$  and  $\alpha_{ab}$  are non-zero). Symmetrically, when *a* is comparatively high, the  
462 optimal strategy is a “*a*-*b* converter” (green sector, only  $\alpha_a$  and  $\alpha_{ba}$  are non-zero).  
463 Otherwise, the maximizing strategy is an “importer” which imports both nutrients without  
464 conversion (red sector, only  $\alpha_a$  and  $\alpha_b$  are non-zero). On the border between sectors,  
465 the maximal growth contour has a discontinuous slope.  
466

467 Evolutionarily stable coexistence occurs at these discontinuous points. If an  
468 environment point  $\vec{c}_0$  is located in a continuous region of the maximal growth contour,  
469 only one maximizing strategy  $\vec{\alpha}_{\max}(\vec{c}_0)$  exists for that environment (maximizing  
470 strategies along the maximal growth contour are indicated by colored squares in Fig  
471 5C). Supply conditions that make  $\vec{\alpha}_{\max}(\vec{c}_0)$  the optimal strategy (i.e. allow  $\vec{\alpha}_{\max}(\vec{c}_0)$  to  
472 create the steady-state environment  $\vec{c}_0$ ) constitute the supply line for  $\vec{c}_0$  and  $\vec{\alpha}_{\max}(\vec{c}_0)$ .  
473 However, at the discontinuous points of the maximal growth contour, where two classes  
474 of strategies meet, two different strategies are both maximizing. For example, at the  
475 purple dot in Fig 5C a strategy belonging to the “*b*-*a* converter” class (species *Blue*) and  
476 one belonging to the “importer” class (species *Red*) are both maximizing strategies.  
477 Each strategy derives a supply line from the purple dot (black dashed line, Fig 5C). The  
478 two supply lines span a gray region where no supply line from any single strategy  
479 enters. Correspondingly, for any supply conditions inside the gray region, no single  
480 species can alone create an environment on the maximal growth contour. For example,  
481 under the supply condition shown by the black open circle in the gray region, species  
482 *Blue* and species *Red* both create nutrient environments that lie within the maximal  
483 growth contour (blue and red dots, Fig 5C), and are thus subject to invasion by other  
484 species. Nevertheless, the species-specific growth contours of *Blue* and of *Red*  
485 intersect at the purple point on the maximal growth contour. Therefore, only when *Blue*  
486 and *Red* coexist can they co-create an environment on the maximal growth contour,  
487 and thus resistant to invasion from any other species. Indeed, when we simulate

488 multiple species with different maximizing strategies under the supply condition  
489 indicated by the open black circle, species *Blue* and species *Red* are the only two that  
490 survive (Fig 5C, inset).

491  
492 The optimal coexistence of species *Blue* and species *Red* can be understood intuitively  
493 from the dynamic fitness landscape. Given a nutrient environment, the relation between  
494  $\alpha_a$  and growth rate of importer (red curve) or *a-b* converter (green curve), and that  
495 between  $\alpha_b$  and growth rate of *b-a* converter (green curve) constitute the fitness  
496 landscape of species adopting different possible maximizing strategies (Fig 5D). In the  
497 environment created by species *Blue* (blue dot in Fig 5C), not only will some importers  
498 grow faster than *Blue*, species *Blue* (strategy marked by blue diamond) is not even on  
499 the fitness peak of its own class (Fig 5D, upper box). Similarly, in the environment  
500 created by species *Red*, the strategy of *Red* is not at the top of the fitness landscape  
501 (Fig 5D, middle box). By contrast, in the environment co-created by species *Blue* and  
502 *Red* (purple dot in Fig 5C), their strategies are at the top of the fitness landscapes of  
503 their own classes and at equal height. For all supply conditions in the gray region,  
504 species *Blue* and species *Red* jointly drive the nutrient concentrations to the  
505 discontinuous point of the optimal growth contour, and thereby achieve evolutionarily  
506 stable coexistence.

### 507 508 **Species creating a new nutrient dimension**

509 As discussed in the introduction, one possible solution to the paradox of plankton is the  
510 creation of new nutrient “dimensions” by species secreting metabolites that can be  
511 utilized by other species. For example, *E. coli* secretes acetate as a by-product of  
512 glucose metabolism. Accumulation of acetate impedes the growth of *E. coli* on glucose  
513 (Luli & Strohl, 1990), but the acetate can be utilized as a carbon source by mutant  
514 strains that emerge in long-term evolution experiments (D'Souza et al., 2018;  
515 Rosenzweig, Sharp, Treves, & Adams, 1994).

516  
517 To explore the possibilities of evolutionarily stable coexistence when species create  
518 new nutrients, we used a simplified model to represent multi-step energy generation  
519 with a dual-role intermediate metabolite (Fig 6A). A single chemical energy source *S* is  
520 supplied into the chemostat. The pathway for processing *S* consists of four relevant  
521 reactions driven by designated enzymes: External *S* can be imported and converted into  
522 intermediate  $I_{int}$  to generate ATP (with corresponding fraction of enzyme budget  
523  $\alpha_{ATP1}$ ). The intermediate has a dual role in energy production: on the one hand, it  
524 positively contributes to ATP production via a downstream reaction (with fraction of  
525 enzyme budget  $\alpha_{ATP2}$ ); on the other hand, it negatively contributes to ATP production  
526 through product inhibition of the first energy-producing reaction. To deal with the  
527 negative effect of internal intermediate, cells may synthesize transporters to export  
528 intermediate out into environment, where it becomes external intermediate  $I_{ext}$  (fraction  
529 of enzyme budget  $\alpha_{exp}$ ). By this reaction, cell can increase the dimension of nutrient  
530 space from one (*S*) into two (*S* and  $I_{ext}$ ). Cells can also import  $I_{ext}$  into  $I_{int}$  (fraction of  
531 enzyme budget  $\alpha_{imp}$ ), then use  $I_{int}$  as an energy source via the second reaction. (See  
532 Methods for details.)

533



534 The metabolic strategy  $\vec{\alpha}$  in this model has four components:  $\vec{\alpha} = (\alpha_{ATP1}, \alpha_{ATP2}, \alpha_{exp},$   
535  $\alpha_{imp})$ . When we examine the maximizing strategies and maximal growth rates in the  
536 nutrient space, three distinctive classes of strategy emerge (Fig 6B). When S is  
537 abundant and  $I_{ext}$  is low, the maximizing strategies have only two non-zero components,  
538  $\alpha_{ATP1}$  and  $\alpha_{exp}$  (Fig S3B), meaning this class of species only imports S for the first  
539 energy-generating reaction then exports intermediate as waste. Therefore, we call  
540 strategies in this class “polluters” (blue section in Fig 6B, Fig S3C). When  $I_{ext}$  is high  
541 while S is low, the maximizing strategies have two different non-zero components,  $\alpha_{ATP2}$   
542 and  $\alpha_{imp}$  (Fig S3B), meaning this class of species solely relies on  $I_{ext}$  as its energy  
543 source. We call these strategies “cleaners” as they clean up the  $I_{ext}$  in the environment,  
544 which is detrimental to the polluters (green section in Fig 6B, Fig S3C). When there are  
545 comparable amounts of S and  $I_{ext}$  present, a third class of maximizing strategies  
546 appears: these cells neither export nor import intermediates, but rather allocate all  
547 enzyme budget to  $\alpha_{ATP1}$  and  $\alpha_{ATP2}$  to carry out both energy-producing reactions. We  
548 call species in this class “generalists” (red section in Fig 6B, Fig S3C).

549  
550 As shown in Fig 6B, on the borders between classes of strategies in nutrient space, the  
551 maximal growth contours turn discontinuously. These points of discontinuity, as in the  
552 previous section, are nutrient environments corresponding to evolutionarily stable  
553 coexistence of species from distinct metabolic classes. The classes of optimally  
554 coexisting species change with dilution rate. When the dilution rate is low ( $d = 0.4$ , Fig  
555 6C), at the discontinuous point of the maximal growth contour, the corresponding two  
556 maximizing strategies are one polluter (species *Blue*) and one cleaner (species *Green*).  
557 Their supply lines span a gray region where both species *Blue* and species *Green* are  
558 required to create a steady-state environment on the maximal growth contour. As we  
559 are only supplying the system with S, the supply condition always lies on the x-axis of  
560 concentration space. For the supply condition shown by the black open circle in Fig 6C,  
561 polluter *Blue* creates a nutrient environment (blue dot) far from the maximal growth  
562 contour. When the cleaner *Green* is added to the system, not only does the biomass of  
563 *Blue* increase (inset), but also the steady-state nutrient environment moves to the  
564 discontinuous point of the maximal growth contour (cyan dot), where both *Blue* and  
565 *Green* occupies the peaks of their fitness landscapes (Fig 6D). This result is consistent  
566 with the long-term evolution experiment of *E. coli* and also intuitive: polluter *Blue* and  
567 cleaner *Green* form a mutually beneficial relationship by, respectively, providing  
568 nutrients and cleaning up waste for each other, thereby reaching an optimal cooperative  
569 coexistence.

570  
571 A quite different coexistence occurs at higher dilution rate ( $d = 0.6$ , Fig 6E). Growth  
572 contours at this dilution rate show two turning points, but neither are between the  
573 polluter and the cleaner class. One discontinuous point is between the cleaner class  
574 (green squares) and the generalist class (red squares), but the gray region spanned by  
575 the corresponding supply lines does not cover the x-axis and so does not represent an  
576 attainable coexistence when only S is supplied. The other discontinuous point is  
577 between the generalist class and the polluter class (blue squares). The gray region  
578 spanned by the supply lines of the corresponding two maximizing strategies of  
579 generalist class (species *Red*) and polluter class (species *Blue*) does cover the x-axis.

580 Therefore, a supply condition with only S within the gray region (e.g., the black open  
581 circle) leads to the optimal coexistence of generalist *Red* and polluter *Blue* on the  
582 discontinuous point (purple dot), despite the fact that they do not directly benefit each  
583 other. Indeed, when the generalist *Red* is added to a system with polluter *Blue* and a  
584 cleaner *Green*, the cleaner *Green* goes extinct and the biomass of the polluter *Blue*  
585 decreases (inset). Nevertheless, the steady-state nutrient environment is moved from a  
586 cyan dot lying inside the maximal growth contour to the purple dot lying on the maximal  
587 growth contour. In the environment of the cyan dot created by cleaner *Green* and  
588 polluter *Blue*, *Blue* is not on the top of the fitness landscape of the polluter class (Fig 6F,  
589 upper box). By contrast, for the fitness landscape created by polluter *Blue* and  
590 generalist *Red* (Fig 6F, lower box), despite being lower in biomass, *Blue* occupies the  
591 top of the landscape. Therefore, the optimal coexistence of this polluter and this  
592 generalist does not arise from direct cooperation, but rather from collaborating to defeat  
593 other competitors.

## 594 DISCUSSION

595 The phrase "survival of the fittest" used to describe natural selection can be applied  
596 both to competition within species and to species competing in the same environment.  
597 One doctrine governing resource competition among species is the competitive  
598 exclusion principle: theoretically, there should be no more surviving species than the  
599 number of resources. However, the enormous diversity of coexisting species in the  
600 natural world seems to contradict the competitive exclusion principle. This so-called  
601 "paradox of the plankton" has stimulated many theoretical models of resource  
602 competition, each with its own assumptions and different conclusions. In this work, we  
603 examined a range of models for metabolic competition among microbes within a unified  
604 framework, using the species-environment feedback as an organizing principle and the  
605 geometric "rule of invasion" and dynamic fitness landscapes as common tools. Under  
606 this unified framework, it becomes apparent how metabolic tradeoffs promote diversity  
607 by allowing a dynamic fitness landscape without a fittest peak. The implications of non-  
608 static landscapes have been under discussion (de Visser, Elena, Fragata, &  
609 Matuszewski, 2018) ever since the introduction of fitness landscapes by Wright (Wright,  
610 1932). Nonetheless, in most of these studies, variability in fitness is introduced by  
611 externally-imposed environmental fluctuations (Mustonen & Lässig, 2009; Zhang, 2012).  
612 In our work, we focused on how fitness landscapes can be intrinsically dynamic due to  
613 species' own actions on their environment.

614  
615 Graphical representations of resource-competition models are not new. The school of  
616 contemporary niche theory dates back almost 50 years (MacArthur, 1970; David Tilman,  
617 1980, 1982), and the growth contours in our work reduce to the zero-net growth  
618 isoclines (ZNGI) introduced by this school in the particular case of two growth-promoting  
619 resources. Our framework, nonetheless, differs in several aspects: First, we focused on  
620 metabolic models with trade-offs, for which there are not only different ZNGIs for  
621 different species but a continuous family of growth contours, and the envelope of all  
622 growth contours is the maximal growth contour. Given these resource allocation trade-  
623 offs, the growth contours of any pair of species must intersect, clearly demonstrating  
624 why metabolic trade-offs prevent a single species from unconditional dominance.  
625 Moreover, the definition of growth contours is not limited by the number of resources,  
626 nor constrained by whether external chemical concentrations contribute positively or  
627 negatively to growth, making the approach suitable to address more realistic metabolic  
628 models. Second, the introduction of the flux-balance curve, in addition to the supply  
629 line, makes it easier to determine the species-specific environment for a given supply  
630 condition, which is particularly useful for determining the non-invasible environment as  
631 the intersection between maximal growth contour and the maximal flux-balance curve.  
632 In brief, our new graphical approach is well suited to our goals of understanding  
633 coexistence from the perspective of species-environment feedback, demonstrating how  
634 the fitness landscape is changed by the species present, and identifying evolutionarily  
635 stable strategies.

636  
637 Our work is not aimed at adding another solution to the paradox of the plankton. Rather  
638 we provide a graphic tool to unify several approaches, and suggest how different

639 proposed solutions to the paradox can emerge intrinsically from competition for  
640 resources. When nutrients are substitutable, resource competition among species with  
641 metabolic trade-offs has been shown to lead to emergent neutrality (Posfai et al., 2017),  
642 as the fitness landscape is made flat by the competing species. Other commonly  
643 invoked solutions to the paradox of the plankton are extrinsic temporal and/or spatial  
644 heterogeneity. In this work, we showed that both types of heterogeneity can also  
645 emerge intrinsically from species-environment feedback. When the rule of invasion  
646 allows non-transitive loops, oscillations and chaos can occur, which have been shown  
647 to allow coexistence beyond competitive exclusion (Huisman & Weissing, 1999, 2001).  
648 In addition, when multiple nutrients are all essential, the ability of each species to create  
649 an environment that favors itself allows for the spontaneous emergence of spatial  
650 heterogeneity in an extended system (Fig S2).

651  
652 Yet, even if fixed species can coexist in an ecosystem, will coexistence survive the  
653 ceaseless process of mutation and adaptation? Our approach provides a general  
654 protocol to determine non-invasible/evolutionarily stable metabolic strategies, which we  
655 demonstrate in the context of three different metabolic models. In these examples, there  
656 is a unique non-invasible solution at the intersection of the maximal growth contour and  
657 the maximal flux-balance curve. Nevertheless, other models for species competition  
658 suggest multiple or, in some cases, zero evolutionarily stable outcomes. For example, in  
659 a metabolic model with multiple essential nutrients, Goyal et al. (Goyal, Dubinkina et al.  
660 2018) found multistability in a discrete strategy space, with each steady state non-  
661 invasible. By contrast, a study based on a Lotka-Volterra model (in which resource  
662 competition is taken to contribute to direct interactions between species (Letten et al.,  
663 2017)) found that evolution via continuous introduction of new species drives the system  
664 into an chaotic state with a large number of species, i.e. coexistence without a steady  
665 state (Ackland & Gallagher, 2004). In the future it will be worthwhile to employ graphical  
666 approaches to investigate what types of metabolic models with various shapes of  
667 growth contours and flux-balance curves can lead to such non-unique non-invasible  
668 outcomes of resource competition.

669  
670 Another advantage of our graphical approach, besides providing an intuitive picture of  
671 species competition, is that it can help understand and control nutrient limitation in  
672 chemostat experiments. The capacity of species to shape their own environment, even  
673 in a system as simple as a chemostat, presents challenges to controlling which nutrient  
674 or nutrients are limiting. By traditional definition, if increasing a certain nutrient leads to  
675 an increase of a cell's growth rate, that nutrient is considered "limiting". However,  
676 growth rate is invariant in a chemostat, being set experimentally by the dilution rate, so  
677 inferring nutrient limitation requires special attention. For example, if one sees the same  
678 cellular responses under different nutrient supplies, what can one conclude? Cells may  
679 be creating the same nutrient environment out of different supply conditions (*cf.* Fig 1D),  
680 or alternatively cells may be transducing different nutrient environments into the same  
681 physiological response through mechanisms such as "ratio sensing" (Escalante-Chong  
682 et al., 2015). Our graphical approach combined with direct measurements of steady-  
683 state nutrient concentrations in the chemostat can precisely define and help control  
684 nutrient limitation (Boer, Crutchfield, Bradley, Botstein, & Rabinowitz, 2010)(Boer et al.,

685 2010). As described above, changes in supply concentrations shift the flux-balance  
686 curve, but do not change the shape of the growth contour. Therefore, by experimentally  
687 varying the supply conditions and measuring the nutrient environment created by cells,  
688 the shape of the growth contour can be obtained. The resulting slope of the growth  
689 contour provides information on nutrient limitation even in the absence of detailed  
690 knowledge about a cell's metabolism. For example, in the nutrient *a* - nutrient *b* plane, a  
691 near-horizontal growth contour indicates *b*-limited growth while a near-vertical growth  
692 contour means *a*-limited growth, and an intermediate slope implies that the two nutrients  
693 are co-limiting.

694  
695 Many future directions can follow this work. From the perspective of experiment, our  
696 framework can assist in analyzing and interpreting results of microbial evolution in the  
697 lab (Van den Bergh, Swings, Fauvart, & Michiels, 2018), where the continual  
698 emergence of new mutants under defined experimental conditions suggests an  
699 intrinsically dynamic fitness landscape. From the perspective of theory, we do not yet  
700 have a rigorous mathematical theorem about the conditions for discontinuity of the  
701 maximal growth contour, nor proof that discontinuity necessarily leads to evolutionarily  
702 stable coexistence. Theoretical developments paralleling those on the general existence  
703 of ecologically stable states (De Leenheer, Levin, Sontag, & Klausmeier, 2006;  
704 Marsland III, Cui, & Mehta, 2019) would bring a more comprehensive understanding of  
705 evolutionarily optimal states in metabolic models. Besides, the metabolic models  
706 considered in this work are highly simplified. Going forward, more detailed and  
707 experimentally-based models can be examined using the same graphical framework.

708 **METHODS**

709 Programs for this work is coded in MATLAB R2018a. A repository of all tools used to  
 710 generate results in this program can be found at:

711 <https://github.com/zhiyuanli1987/Qbiotoolbox.git>

712

713 **Total RNA and total protein measurements**

714 The method for total RNA and protein measurements is described in (Li et al., 2018).

715

716 **Supplemental Table 1: Symbols**

| Chemostat parameters                                                                                  |                                                                                                                                                                                                                        |
|-------------------------------------------------------------------------------------------------------|------------------------------------------------------------------------------------------------------------------------------------------------------------------------------------------------------------------------|
| $\vec{c}_{\text{supply}} = (c_{1, \text{supply}}, c_{2, \text{supply}}, \dots, c_{p, \text{supply}})$ | Nutrient supply. $c_{i, \text{supply}}$ is the concentration of the $i$ -th nutrient in the supply.                                                                                                                    |
| $d$                                                                                                   | Dilution rate (same as supply influx rate to keep volume fixed).                                                                                                                                                       |
| Chemostat variables                                                                                   |                                                                                                                                                                                                                        |
| $\vec{c}_k = (c_{1,k}, c_{2,k}, \dots, c_{p,k})$                                                      | Nutrient environment inside the $k$ -th chemostat. $c_{i,k}$ is the concentration of the $i$ -th nutrient within the medium of the $k$ -th chemostat. All possible $\vec{c}$ constitute the “nutrient space”.          |
| $m_{\sigma,k}$                                                                                        | Biomass density of species $\sigma$ in the $k$ -th chemostat.                                                                                                                                                          |
| Species-specific quantities                                                                           |                                                                                                                                                                                                                        |
| $\vec{\alpha}_\sigma = (\alpha_{1,\sigma}, \alpha_{2,\sigma} \dots)$                                  | Resource allocation strategy of species $\sigma$ . $\alpha_{j,\sigma}$ is the fraction of resources allocated to the $j$ -th cellular function by species $\sigma$ .                                                   |
| $\vec{q}_\sigma$                                                                                      | Intracellular concentrations of growth-related metabolites for species $\sigma$ .                                                                                                                                      |
| $g(\vec{c}, \vec{q}, \vec{\alpha})$                                                                   | Growth rate as a function of $\vec{c}$ , $\vec{q}$ , and $\vec{\alpha}$ .                                                                                                                                              |
| $I_i(\vec{c}, \vec{q}, \vec{\alpha})$                                                                 | Intake rate per biomass of the $i$ -th nutrient as a function of $\vec{c}$ , $\vec{q}$ , and $\vec{\alpha}$ . $I_i(\vec{c}, \vec{q}, \vec{\alpha})$ can be negative to describe cells exporting secondary metabolites. |
| $r$                                                                                                   | Biomass concentration within a cell, taken to be a constant that always equal to 100.                                                                                                                                  |
| $\vec{f}(\vec{I}(\vec{c}, \vec{q}, \vec{\alpha}), \vec{q}, \vec{\alpha})$                             | Functions defining the changing rate of intracellular metabolite concentrations $\vec{q}$ , as a function of $\vec{c}$ , $\vec{q}$ , and $\vec{\alpha}$ .                                                              |
| $GC_\sigma$                                                                                           | Growth-rate contour of species $\sigma$ .                                                                                                                                                                              |
| $FB_\sigma$                                                                                           | Flux-balance curve of species $\sigma$ .                                                                                                                                                                               |
| $\vec{c}_{\sigma, \text{ss}}$                                                                         | The steady-state environment created by one species $\sigma$ .                                                                                                                                                         |



|                             |                                                                                        |
|-----------------------------|----------------------------------------------------------------------------------------|
| $SL_{\sigma}(\vec{c})$      | The supply line for species $\sigma$ in environment $\vec{c}$ .                        |
| $\{\sigma^*\}$              | A set of species stably surviving in chemostat. A set can contain one or more species. |
| $\vec{c}_{\{\sigma^*\},ss}$ | The steady-state environment created by a set of species $\{\sigma^*\}$ .              |

717

718 **Metabolic model and resource allocation strategy**

719 In modeling population dynamics in a chemostat, multiple assumptions need to be  
 720 made concerning how cells sense the environment, import nutrients, export metabolites,  
 721 utilize resources, and grow in biomass. Different assumptions result in different  
 722 metabolic models. Some metabolic models focus on trade-offs in resource allocation, as  
 723 the amount of resources “owned” by a cell, including proteins and energy, is limited.  
 724 Cells need to allocate these limited resources into different cellular functions, such as  
 725 metabolism, gene expression, reproduction, motility, maintenance, etc. We use  $\alpha_{j,\sigma}$  to  
 726 represent the fraction of resources allocated to the  $j$ -th cellular function of species  $\sigma$ ,  
 727 with  $\vec{\alpha}_{\sigma} = (\alpha_{1,\sigma}, \alpha_{2,\sigma} \dots)$  representing the resource allocation strategy of species  $\sigma$ . For  
 728 simplicity, we assume each species has a fixed resource allocation strategy.

729

730 **Dynamic equations for a single species in a chemostat**

731 In a chemostat with nutrient supply  $\vec{c}_{\text{supply}}$ , dilution rate  $d$  and a single species  $\sigma$  with  
 732 fixed strategy  $\vec{\alpha}_{\sigma}$  and intracellular metabolite concentration  $\vec{q}_{\sigma}$ , the cell biomass density  
 733  $m_{\sigma}$  and the chemostat nutrient concentrations  $\vec{c}$  are generally described by the following  
 734 equations:

$$\frac{dm_{\sigma}}{dt} = m_{\sigma} \cdot (g(\vec{c}, \vec{q}_{\sigma}, \vec{\alpha}_{\sigma}) - d), \quad (\text{S1})$$

$$\frac{d\vec{c}}{dt} = d \cdot (\vec{c}_{\text{supply}} - \vec{c}) - m_{\sigma}/r \cdot \vec{I}(\vec{c}, \vec{q}_{\sigma}, \vec{\alpha}_{\sigma}). \quad (\text{S2})$$

735 In considering the details of cellular metabolism, one may choose to incorporate the  
 736 dynamics of intracellular metabolites that originate from nutrient import and influence  
 737 cell growth. We make the assumption that the biomass concentration  $r$ , e.g. protein  
 738 concentration, is constant for cells under all growth conditions. Thus, an increase of  
 739 total cell mass induces a linear increase of total cell volume.  $m_{\sigma}$  is the cell mass per  
 740 volume in the chemostat, and  $r$  is the cell mass per volume within a cell. For a  
 741 chemostat-to-cell flux of mass  $J$ , the concentration of the metabolite in chemostat  
 742 decrease by  $J/V_{\text{chemostat}}$  while the concentration in cell increase by  $J/V_{\text{cell}}$ . As a result,  
 743 the metabolites imported into cells are enriched by a factor of  $r$ , and metabolites  
 744 secreted by cells are diluted by  $1/r$ . Also, all metabolites are diluted by cellular growth,  
 745 which is generally a slow process compared to metabolic reactions and can be ignored  
 746 in most cases. We use a function  $\vec{f}(\vec{I}(\vec{c}, \vec{q}, \vec{\alpha}), \vec{q}, \vec{\alpha})$  to represent the rate of change of  
 747 intracellular metabolite  $\vec{q}_{\sigma}$ :

$$\frac{d\vec{q}_{\sigma}}{dt} = \vec{f}(\vec{I}(\vec{c}, \vec{q}_{\sigma}, \vec{\alpha}_{\sigma}), \vec{q}_{\sigma}, \vec{\alpha}_{\sigma}). \quad (\text{S3})$$

748 Where Eq. (S2) represents  $p$  equations for  $p$  types of nutrients, and Eq. (S3) represents  
 749  $h$  equations for  $h$  growth-related intracellular metabolites.

750

751 **Species-specific steady state**

752 In the steady state of chemostat, Eqs. (S1)- (S3) should be all equal to zero.

753 For intracellular metabolites, as  $\vec{f}(\vec{I}(\vec{c}, \vec{q}_\sigma, \vec{\alpha}_\sigma), \vec{q}_\sigma, \vec{\alpha}_\sigma) = 0$  as a result of Eq. (S3)=0,  
754 given an environment  $\vec{c}$ , the steady state of  $\vec{q}_\sigma$  can be expressed as a function of  $\vec{c}$ :

755  $\vec{q}_\sigma^* = \vec{f}^{-1}(\vec{c}, \vec{\alpha}_\sigma).$

756 **Growth contour (GC):** From the perspective of the environment influencing species, at  
757 each constant environment, the steady-state growth rate is fully determined by  $\vec{c}$ :

758  $g^*(\vec{c}, \vec{q}_\sigma) = g(\vec{c}, \vec{f}^{-1}(\vec{c}, \vec{\alpha}_\sigma)).$  If the biomass of a species is non-zero ( $m \neq 0$ ), Eq. (S1)  
759 requires  $g^* = d$ . In the  $p$ -dimensional nutrient space, this requirement defines a  $(p - 1)$ -  
760 dimensional surface, constituted by all environments  $\vec{c}$  that support an equal-to-dilution  
761 growth rate. This surface reduces to the zero-growth isoclines in contemporary niche  
762 theory when the nutrient space is two-dimensional and the growth rate  $g$  solely relies on  
763  $\vec{c}$  monotonically, but is not necessarily limited by the nutrient dimension or the form of  
764 the growth function. For convenience, we name this surface the “growth contour” (GC)  
765 for species  $\sigma$ :

$$GC_\sigma := \{\vec{c} \mid g(\vec{c}, \vec{f}^{-1}(\vec{c}, \vec{\alpha}_\sigma), \vec{\alpha}_\sigma) = d\}. \quad (\text{S4})$$

766 An example of growth contours is shown in Fig 1D.

767  
768 **Flux-balance curve (FB):** Eq. (S2) describes how species act on the environment. In  
769 steady state, the influx, out-flux, and consumption by species should be balanced for  
770 each nutrient, which enables calculation of the biomass density-to-dilution ratio for every  
771  $i$ :  $\frac{m_\sigma}{d \cdot r} = \frac{c_{i, \text{supply}} - c_i}{I_i(\vec{c}, \vec{f}^{-1}(\vec{c}, \vec{\alpha}_\sigma), \vec{\alpha}_\sigma)}$ . For a  $p$ -dimensional nutrient space, there are  $p$  equations for the

772 same value of  $\frac{m}{d \cdot r}$ . This leads to a one-dimensional curve in the nutrient space, which we  
773 name the “flux-balance curve” (FB), defined as:

$$FB := \{\vec{c} \mid \frac{c_{i, \text{supply}} - c_i}{I_i(\vec{c}, \vec{f}^{-1}(\vec{c}, \vec{\alpha}_\sigma), \vec{\alpha}_\sigma)} = \frac{m_\sigma}{d \cdot r} \text{ AND } c_i < c_{i, \text{supply}}\}. \quad (\text{S5})$$

774 For example, for two nutrients  $a$  and  $b$ , the flux balance curve is:  $\frac{c_{a, \text{supply}} - c_a}{I_a(\vec{c}, \vec{f}^{-1}(\vec{c}, \vec{\alpha}_\sigma), \vec{\alpha}_\sigma)} -$

775  $\frac{c_{a, \text{supply}} - c_a}{I_a(\vec{c}, \vec{f}^{-1}(\vec{c}, \vec{\alpha}_\sigma), \vec{\alpha}_\sigma)} = 0$ , as demonstrated in Fig 1D.

776 In nutrient space, the steady-state environment ( $\vec{c}_{\sigma, \text{ss}}$ ) with non-zero biomass of species  
777  $\sigma$  will be located at the intersection of the growth contour and the flux-balance curve.

778 This environment is constructed by the species  $\sigma$  via its consumption of nutrients. If  $\vec{c}_{\sigma, \text{ss}}$   
779 exists, this species can survive in the chemostat. Otherwise, this species will be washed  
780 out by dilution even without competition from other species. For the following  
781 discussion, we only consider species that can survive when alone in a chemostat.

782  
783 **Supply line (SL):** The flux-balance curve is determined by the supply condition  $\vec{c}_{\text{supply}}$ . In  
784 many cases, it is helpful to derive the supply conditions that enable a species  $\sigma$  to  
785 construct a steady-state environment  $\vec{c}_{\sigma, \text{ss}}$ . All possible values of  $\vec{c}_{\text{supply}}$  that can  
786 produce a given  $\vec{c}_{\sigma, \text{ss}}$ , form a straight line in the space of supply concentrations,  
787 described by:

$$SL := \{\vec{c}_{\text{supply}} \mid \vec{c}_{\text{supply}} = \frac{m_\sigma}{d \cdot r} \cdot \vec{I}(\vec{c}_{\sigma, \text{ss}}, \vec{f}^{-1}(\vec{c}_{\sigma, \text{ss}}, \vec{\alpha}_\sigma), \vec{\alpha}_\sigma) + \vec{c}_{\sigma, \text{ss}}\}, \quad (\text{S6})$$

788 with varying non-negative values of  $m_\sigma/d$ . An example of a supply line is shown in  
789 Fig 1D.

790

### 791 **Dynamic equations for multiple species in a chemostat**

792 In nutrient competition models, multiple species ( $\sigma = 1 \dots n$ ) each with biomass density  
793  $m_\sigma$  compete for resources. They have species-specific growth rates  $g(\vec{c}, \vec{q}_\sigma, \vec{\alpha}_\sigma)$  and  
794 import rates  $\vec{I}(\vec{c}, \vec{q}_\sigma, \vec{\alpha}_\sigma)$ , yet all experience the same nutrient environment  $\vec{c}$ . Therefore,  
795 Eq. (S1) and Eq. (S3) remain the same for each species, while the rate of change of  
796 chemostat nutrient concentrations is influenced by the summed action of all species:

$$\frac{d\vec{c}}{dt} = d \cdot (\vec{c}_{\text{supply}} - \vec{c}) - \sum_{\sigma=1}^n m_\sigma/r \cdot \vec{I}(\vec{c}, \vec{q}_\sigma, \vec{\alpha}_\sigma). \quad (\text{S7})$$

797

### 798 **Multiple species steady state**

799 Multiple species, even if each alone can survive in chemostat, do not generally coexist  
800 when competing together. For a system starting with  $n$  different species, the stable  
801 steady state contains  $n^*$  ( $1 \leq n^* \leq n$ ) species with non-zero biomass. We define these  
802  $n^*$  surviving species as a stable species set  $\{\sigma^*\}$ , and mark the steady-state  
803 environment created by this set as  $\vec{c}_{\{\sigma^*\}, \text{ss}}$ . If  $n > 1$ , according to Eq. (S1),  $\vec{c}_{\{\sigma^*\}, \text{ss}}$  must be  
804 located at the common intersection of growth contours formed by every species in  $\{\sigma^*\}$ .

805

### 806 **Invasion**

807 Invasion is defined as introducing a small number of invaders (with biomass density  
808  $m_{\text{inv}}$ ) to a steady-state chemostat occupied by a set of local species. At the time of  
809 introduction, if the invader can increase in biomass ( $\frac{dm_{\text{inv}}}{dt} > 0$ ), the invasion is  
810 successful; otherwise if the invader decreases in biomass ( $\frac{dm_{\text{inv}}}{dt} < 0$ ), the invasion is  
811 unsuccessful. If the biomass stays constant ( $\frac{dm_{\text{inv}}}{dt} = 0$ ), the species is neutral with  
812 respect to the local species.

813 In evaluating invasion by a species  $\sigma$  with strategy  $\vec{\alpha}_\sigma$  of any environment  $\vec{c}$ , we make  
814 two assumptions:

- 815 1. The biomass of the invader is so small that it does not disturb the environment at the  
816 time of introduction.
- 817 2. There is a separation of timescales such that the concentrations of intracellular  
818 metabolites reach equilibrium instantaneously at the time of introduction of the invader,  
819 therefore Eq. (S3) is always equal to zero and  $\vec{q}_\sigma = \vec{f}^{-1}(\vec{c}, \vec{\alpha}_\sigma)$  holds.

820 Therefore, we define the “invasion growth rate” of a species  $\sigma$  with strategy  $\vec{\alpha}_\sigma$   
821 introduced into environment  $\vec{c}$  as:

$$g_{\text{inv}}(\vec{\alpha}|\vec{c}) = g(\vec{c}, \vec{f}^{-1}(\vec{c}, \vec{\alpha}), \vec{\alpha}). \quad (\text{S8})$$

822 **Invasion zone:** By definition, the growth contour of the invader  $GC_{\text{inv}}$  divides the nutrient  
823 space into two regions: an “invasion zone” that includes all environments where the  
824 invader has an invasion growth rate higher than dilution, and “no-invasion zone” where  
825 the invader has an invasion growth rate lower than dilution. If the steady-state  
826 environment constructed by local species  $\vec{c}_{\{\text{local}\}, \text{ss}}$  is located within the invasion zone of

827 the invader,  $g_{\text{inv}}(\vec{\alpha}_{\text{inv}}|\vec{c}_{\{\text{local}\},\text{ss}}) > d$ , therefore  $\frac{dm_{\text{inv}}}{dt} > 0$  by Eq. (S1), and the invasion is  
 828 successful; otherwise, if  $\vec{c}_{\{\text{local}\},\text{ss}}$  is located outside of the invasion zone of the invader,  
 829  $g_{\text{inv}}(\vec{\alpha}_{\text{inv}}|\vec{c}_{\{\text{local}\},\text{ss}}) < d$ , and the invasion is unsuccessful. If  $\vec{c}_{\{\text{local}\},\text{ss}}$  locate exactly on  
 830 the growth contour, it is neutral.

831 Two examples of this rule of invasion are presented in Fig 2A and 2B.

832 If the growth rate monotonically increases with the concentration of each nutrient, it can  
 833 be proven that the invasion zone is always above the growth contour of the invader (an  
 834 environment  $\vec{c}_+$  “above” the growth contour  $GC_{\text{inv}}$  is defined as  $\exists \vec{c}_0 \in GC_{\text{inv}}, \text{ s.t. } c_{i,+} \geq$   
 835  $c_{i,0} \forall i$ ). If the growth rate is not monotonically increasing with nutrient concentrations,  
 836 identifying the invasion zone requires more model-specific analysis.

837

### 838 **Fitness landscape**

839 We quantified the fitness landscapes in the chemostat via the relationship between  
 840 metabolic strategies  $\vec{\alpha}$  and the invasion growth rates of an invader adopting strategy  $\vec{\alpha}$   
 841 in a given nutrient environment  $\vec{c}$ . Specifically,  
 842

$$\text{Fitness landscape} := g_{\text{inv}}(\vec{\alpha}|\vec{c}). \quad (\text{S9})$$

843 Each environment  $\vec{c}$  defines a fitness landscape. A set of species  $\{\sigma^*\}$  constructs a  
 844 steady-state environment  $\vec{c}_{\{\sigma^*\},\text{ss}}$  and a corresponding fitness landscape  $g_{\text{inv}}(\vec{\alpha}|\vec{c}_{\{\sigma^*\},\text{ss}})$ .  
 845 Some examples of fitness landscapes are shown in Figs 2D, 3C, 4B-C, 5D and 6D-F.

846

### 847 **Non-invasible /optimal/ evolutionarily stable strategies**

848 A set of species  $\{\sigma^*\}_{\text{opt}}$  is non-invasible, aka optimal or evolutionarily stable, if no other  
 849 species can invade the steady-state environment constructed by  $\{\sigma^*\}_{\text{opt}}$ :

$$g_{\text{inv}}(\vec{\alpha}_{\sigma}|\vec{c}_{\{\sigma^*\}_{\text{opt}},\text{ss}}) < d, \forall \sigma \notin \{\sigma^*\}_{\text{opt}}. \quad (\text{S10})$$

850 Equivalently, Eq. (S10) can be expressed as “a set of species  $\{\sigma^*\}_{\text{opt}}$  construct a fitness  
 851 landscape which places themselves on the top”, according to Eq. (S9).

852

853 The steady state constructed by  $\{\sigma^*\}$  is influenced by the supply  $\vec{c}_{\text{supply}}$  and the dilution  
 854 rate  $d$ . For different chemostat parameters, the non-invasible species set  $\{\sigma^*\}_{\text{opt}}$  may  
 855 be different. In the following steps, we described a generally applicable protocol for  
 856 obtaining the non-invasible strategies:

857

858 1. Maximal growth rates and maximizing strategies: In a metabolic model with trade-offs  
 859 in resource allocation, the maximizing resource allocation strategy  $\vec{\alpha}_{\text{max}}$  under a given  
 860 environment  $\vec{c}$  is defined as the strategy that maximizes invasion growth rate:

$$\begin{aligned} g_{\text{max}}(\vec{c}) &:= \max_{\vec{\alpha}}(g_{\text{inv}}(\vec{\alpha}_{\sigma}|\vec{c})) \\ \vec{\alpha}_{\text{max}}(\vec{c}) &:= \arg \max_{\vec{\alpha}}(g_{\text{inv}}(\vec{\alpha}_{\sigma}|\vec{c})). \end{aligned} \quad (\text{S11})$$

861

862 2. Maximal growth contour: For a given dilution rate  $d$ , all environments that support a  
 863 maximal growth rate of  $d$  constitute the “maximal growth contour”:

$$GC_{\max} := \{\vec{c}_0 \mid g_{\max}(\vec{c}_0) = d\}. \quad (\text{S12})$$

864  $GC_{\max}$  is generally formed by many species, with each species adopting the maximizing  
 865 strategies  $\vec{a}_{\max}(\vec{c}_0)$  corresponding to one environment  $\vec{c}_0$  on the maximal growth  
 866 contour.

867  $GC_{\max}$  is outside of the invasion zone for any species  $\sigma$ . (Otherwise, if a species  $\sigma$  could  
 868 invade an environment  $\vec{c}_0$  on  $GC_{\max}$ ,  $g_{\text{inv}}(\vec{a}_{\sigma} \mid \vec{c}_0 \in GC_{\max}) > d$ , this would directly violate  
 869 the requirement by Eqs. (S11) and (S12) that  $\max_{\vec{a}}(g_{\text{inv}}(\vec{a}_{\sigma} \mid \vec{c}_0)) = d$ .) Therefore, the  
 870 necessary and sufficient condition for a set of species to be evolutionarily stable, is to  
 871 construct a steady-state environment on the maximal growth contour:

$$\vec{c}_{\{\sigma^*\}_{\text{opt,ss}}} \in GC_{\max}. \quad (\text{S13})$$

872 Therefore, a strategy belonging to the non-invasible set must be a maximizing strategy.  
 873 An example of maximal growth contour is shown in Fig 4D.

874  
 875 **3. Non-invasible strategy:** Nevertheless, adopting one of the maximizing strategies  
 876 along the maximal growth contour does not guarantee that a species will satisfy Eq.  
 877 (S13) and become non-invasible, as a maximizing strategy for environment  $\vec{c}_1$  may end  
 878 up constructing a different environment  $\vec{c}_2$ . To identify a non-invasible species for supply  
 879 condition  $\vec{c}_{\text{supply}}$ , the flux-balance condition needs to be considered, with the strategies  
 880 maximized at each environment. This requirement forms a “maximal flux-balance curve”  
 881 in the nutrient space:

$$FB_{\max} := \left\{ \vec{c} \mid \frac{c_{i,\text{supply}} - c_i}{I_i(\vec{c}, \vec{f}^{-1}(\vec{c}, \vec{a}_{\max}(\vec{c})), \vec{a}_{\max}(\vec{c}))} = \frac{m}{d \cdot r} \text{ AND } c_i < c_{i,\text{supply}} \right\}. \quad (\text{S14})$$

882 If the intersection of the maximal growth contour and the maximal flux-balance curve  
 883 exists, it is the evolutionarily stable environment under dilution rate  $d$  and supply  
 884 condition  $\vec{c}_{\text{supply}}$ ,  $\vec{c}_{\text{opt}}$ . The maximizing strategy for this environment,  $\vec{a}_{\text{opt}} = \vec{a}_{\max}(\vec{c}_{\text{opt}})$ ,  
 885 constructs the environment  $\vec{c}_{\text{opt}}$ , and is evolutionarily stable.

886  
 887 **4. Evolutionarily stable coexistence at the discontinuous points of the maximal growth**  
 888 **contour:** Inversely, for each environment  $\vec{c}_0$  on the maximal growth contour, all supply  
 889 conditions that enables the maximizing strategy of  $\vec{c}_0$  to become the non-invasible  
 890 strategy can be calculated from the supply line according to Eq. (S6):

$$SL(\vec{c}_0) := \left\{ \vec{c}_{\text{supply}} \mid \vec{c}_{\text{supply}} = x \cdot \vec{I}(\vec{c}_0, \vec{f}^{-1}(\vec{c}_0, \vec{a}_{\max}(\vec{c}_0)), \vec{a}_{\max}(\vec{c}_0)) + \vec{c}_0 \right\}, \quad (\text{S15})$$

891 for any non-zero value of  $x$ . Some examples are shown in Fig 4D.

892 When there are discontinuous points on the maximal growth contour, there can be  
 893 “gaps” in the nutrient supply space, where no single strategy on the maximal growth  
 894 contour satisfies Eq. (S14). Under this condition, more than one strategy are required  
 895 to co-create an environment on the conjunctions of discontinuous points of the maximal  
 896 growth contour. Therefore, discontinuous points of the maximal growth contour permit  
 897 evolutionarily stable coexistence, where  $\{\sigma^*\}_{\text{opt}}$  contains more than one species. Two  
 898 examples of such discontinuities and coexistence are shown in Fig 5 and Fig 6.

899

900 **Metabolic models**



901 Different assumptions can be made regarding the metabolic models  $\vec{f}(\vec{c}, \vec{x}, \vec{\alpha})$ ,  $g(\vec{c}, \vec{x}, \vec{\alpha})$ ,  
 902 and  $\vec{I}(\vec{c}, \vec{x}, \vec{\alpha})$ , focusing on various aspects of cellular growth. Different assumptions lead  
 903 to distinct classes of metabolic models with various results. Nevertheless, our analysis  
 904 schemes, including the invasion geometry, fitness landscape, and evolutionary stable  
 905 strategies, are generally applicable for various metabolic models. In this work, we used  
 906 five metabolic models to illustrate multiple aspects of the species-environment  
 907 feedback:

### 909 1. Metabolic model with two essential nutrients

910 When two nutrients are both essential for growth, such as nitrogen and phosphorus,  
 911 and both require a substantial allocation of resources for import, the system can be  
 912 abstractly modeled as shown in Fig 4A. In this metabolic model, we assume an exact  
 913 trade-off between the allocation of limited resources to import nutrient *a* or nutrient *b*.  
 914 The fraction of resources allocated to import nutrient *a* is represented by  $\alpha_a$ , thus  
 915 leaving a fraction  $\alpha_b = 1 - \alpha_a$  to import nutrient *b*. The import rate of nutrient *i* is  
 916 assumed to follow the Monod equation as a function of nutrient concentration, and is  
 917 proportional to  $\alpha_i$ :

$$I_i(\vec{c}) = \alpha_i \cdot \frac{c_i}{c_i + K_i} \text{ for } i = a, b. \quad (\text{S16})$$

918 Import of both nutrients is required for cell growth:

$$g(\vec{c}) = \gamma \cdot \min(I_a(\vec{c}), I_b(\vec{c})). \quad (\text{S17})$$

919 For this model, for simplicity we do not explicitly consider intracellular metabolites.  
 920 Rather, import directly determines growth.

921 In this model, a “species” is defined by its value of  $\alpha_a$ .

922 Nutrient limitation can be clearly quantified in this system: if  $I_a(\vec{c}) > I_b(\vec{c})$ , the system is  
 923 limited by nutrient *b*; if  $I_a(\vec{c}) < I_b(\vec{c})$ , the system is limited by nutrient *a*.

924  
 925 A species with the following parameters was used to generate Fig 1D and E, focusing  
 926 on how supply conditions and dilution rate influence nutrient limitation:

| $K_a$ | $K_b$ | $\gamma$ | $\alpha_a$ |
|-------|-------|----------|------------|
| 0.7   | 1.3   | 10       | 0.3        |

927 In Fig 1D, to demonstrate how species construct the same environment out of different  
 928 supply conditions, the chemostat dilution rate was set to  $d = 1$ , and three supply  
 929 conditions were used:  $\vec{c}_{\text{supply}} = [0.6, 0.3546]$  (purple),  $\vec{c}_{\text{supply}} = [0.8, 0.5273]$  (cyan), and  
 930  $\vec{c}_{\text{supply}} = [1, 0.7]$  (blue).

931 In Fig 1E, to demonstrate how dilution rates may switch the nutrient, we used the same  
 932 supply condition as the blue condition in Fig 1D ( $\vec{c}_{\text{supply}} = [1, 0.7]$ ), and three dilution  
 933 rates: 0.5 (yellow), 1 (red), and 1.6 (deep red).

934  
 935 Species with following parameters were used to generate Fig 4B-D:

| $K_a$ | $K_b$ | $\gamma$ |
|-------|-------|----------|
| 0.5   | 0.5   | 10       |

936 The strategy  $\alpha_a$  varies for different species. In Fig 4B, Species *Blue* has  $\alpha_a = 0.35$ ,  
 937 species *Red* has  $\alpha_a = 0.65$ . In Fig 4C, we started with species *Blue* and species *Red*.



938 We then generated the fitness landscape for each species at the steady-state  
 939 environment it constructed, then chose the strategy that maximized invasion growth rate  
 940 for this fitness landscape to generate a new species, and iterated this process five  
 941 times. The species *Black* has  $\alpha_a = 0.5$ .

942 In generating Fig 4D, we followed the protocols described in section “Non-invasible /  
 943 evolutionarily stable strategies”.

944

## 945 2. Metabolic model with substitutable nutrients

946 When two nutrients are mutually substitutable for growth, such as glucose and  
 947 galactose, the system can be described by metabolic model as shown in Fig 2A. The  
 948 trade-off and import functions are taken to be the same as in Model 1: metabolic model  
 949 with two essential nutrients. However, import of the two nutrients contributes additively  
 950 toward growth rate:

$$g(\vec{c}) = \gamma \cdot (I_a(\vec{c}) + I_b(\vec{c})). \quad (\text{S18})$$

951 A species is defined by its value of  $\alpha_a$ .

952 For this model, all growth contours intersect at one point. The growth contour of species

953  $\sigma$  satisfies the equation:  $\alpha_a \cdot \frac{c_a}{c_a + K_a} + (1 - \alpha_a) \cdot \frac{c_b}{c_b + K_b} = d/\gamma$ . Regardless of the value of

954  $\alpha_a$ , the environment  $[\frac{K_a}{\frac{\gamma}{d}-1}, \frac{K_b}{\frac{\gamma}{d}-1}]$  is always on the growth contour.

955 Species with the following parameters were used to generate Fig 2B-E:

| $K_a$ | $K_b$ | $\gamma$ |
|-------|-------|----------|
| 1.2   | 0.8   | 3        |

956 The strategy  $\alpha_a$  varies for different species. In Fig 2B-D, Species *Blue* has  $\alpha_a = 0.2$ ,  
 957 species *Red* has  $\alpha_a = 0.6$ . Supply conditions are different among the three figures: in  
 958 Fig 2B,  $\vec{c}_{\text{supply}} = [0.5, 1]$ ; in Fig 2C,  $\vec{c}_{\text{supply}} = [1, 0.5]$ ; in Fig 2D,  $\vec{c}_{\text{supply}} = [1, 1]$ .

959 All conditions in Fig 2E are the same as in Fig 2D, other than that five additional species  
 960 are added to the system. Their strategies are indicated by the legend at the right.

961

## 962 3. Metabolic model with substitutable nutrients that require assimilation

963 In cells, the assimilation of imported raw material, such sugars, into biomass such as  
 964 proteins, takes multiple steps and enzymes and consumes a considerable amount of  
 965 energy. When the resources allocated to nutrient assimilation are considered, a cell's  
 966 strategy becomes more complex. A mathematical model involving three substitutable  
 967 nutrients  $a, b, c$  that need assimilation is shown in Fig 3A, with  $\alpha_{i1}$  represents the  
 968 fraction of resources allocated to importing nutrient  $i$  into internal metabolite, and  $\alpha_{i2}$   
 969 represents the fraction of resources allocated to assimilate the internal  $i$  into biomass. In  
 970 this model, the import rate has a similar form to the previous two models,

$$I_i(c_i) = V \cdot \alpha_{i1} \cdot \frac{c_i}{c_i + K_i}. \quad (\text{S19})$$

971 The internal metabolite concentration  $c_{i,\text{internal}}$  has an influx of  $r \cdot I_i(c_i)$ , meanwhile, it is  
 972 diluted by cell growth in the rate of  $g$ . We assume all nutrients are substitutable  
 973 therefore the internal pools contributes via summation to growth, it is converted into  
 974 biomass at a rate  $k \cdot \alpha_{i2} \cdot c_{i,\text{internal}}$ :

$$\frac{dc_{i,\text{internal}}}{dt} = I_i(c_i) - g(\vec{c}_{\text{internal}}) \cdot c_{i,\text{internal}} - k \cdot \alpha_{i2} \cdot c_{i,\text{internal}}. \quad (\text{S20})$$

975 Therefore, the mass converted into biomass per unit time per unit volume is:  
 976  $\sum_i(k \cdot \alpha_{i2} \cdot c_{i,\text{internal}})$ , and the growth rate defined as the relative gain of total biomass  $M$   
 977 is:

$$g(\vec{c}_{\text{internal}}) = \frac{dM}{dt} = \frac{k}{r} \cdot \sum_i(\alpha_{i2} \cdot c_{i,\text{internal}}). \quad (\text{S21})$$

978  
 979 In generating Fig 4B-C, the chemostat parameters were:  $\vec{c}_{\text{supply}} = [1,1,1]$ , and  $d = 1$ ,  
 980 and the species parameters were:

| $V$  | $K_i$ ( $i = a, b, c$ ) | $k$ |
|------|-------------------------|-----|
| 1000 | 0.5                     | 11  |

981 The three species allocate their resources differently:

| Strategies   | $\alpha_{a1}$ | $\alpha_{a2}$ | $\alpha_{b1}$ | $\alpha_{b2}$ | $\alpha_{c1}$ | $\alpha_{c2}$ |
|--------------|---------------|---------------|---------------|---------------|---------------|---------------|
| <i>Red</i>   | 0.15          | 0.2           | 0.1           | 0.25          | 0.26          | 0.04          |
| <i>Green</i> | 0.26          | 0.04          | 0.15          | 0.2           | 0.1           | 0.25          |
| <i>Blue</i>  | 0.1           | 0.25          | 0.26          | 0.04          | 0.15          | 0.2           |

982  
 983 To generate the Fig S1B, all other parameters are the same, other than  $k = 10$ .  
 984  
 985

#### 986 4. Metabolic model with essential nutrients that can be interconverted

987 If two nutrients are both essential for growth, and a cell is able to convert one nutrient  
 988 into another albeit at a certain cost, as shown in Fig 5A, metabolic trade-offs involve the  
 989 following four elements of the allocation strategy  $\vec{\alpha}$  :

990  $\alpha_a$ : Fraction of resources allocated to import nutrient  $a$ .

991  $\alpha_b$ : Fraction of resources allocated to import nutrient  $b$ .

992  $\alpha_{ab}$ : Fraction of resources allocated to convert internal  $b$  into  $a$ .

993  $\alpha_{ba}$ : Fraction of resources allocated to convert internal  $a$  into  $b$ .

994 To implement trade-offs, the sum of elements of  $\vec{\alpha} = (\alpha_a, \alpha_b, \alpha_{ab}, \alpha_{ba})$  is taken to be  
 995 equal to 1.

996 In this metabolic model, cells internalize nutrient  $a$  and nutrient  $b$  from the chemostat to  
 997 supply internal concentration of nutrients,  $c_{a,\text{internal}}$  and  $c_{b,\text{internal}}$ . Meanwhile, the  
 998 internal nutrients can be converted into each other. Nutrients also diffuse in and out of  
 999 the cell passively with rate  $\beta$ . Cell growth requires both internal nutrients, and depletes  
 1000 them in a fixed proportion.

1001 In this model, the growth rate of a cell is taken to be:

$$g(\vec{c}_{\text{internal}}) = \frac{\gamma}{\frac{K_a}{c_{a,\text{internal}}} + \frac{K_b}{c_{b,\text{internal}}}}. \quad (\text{S22})$$

1002 The net import rate, including passive diffusion, is:

$$I_i = (\alpha_i + \beta) \cdot c_i - \beta \cdot c_{i,\text{internal}}, \quad i = a, b. \quad (\text{S23})$$

1003 Therefore, the dynamical equations for the internal nutrients are:

$$\frac{dc_{a,\text{internal}}}{dt} = I_a + \alpha_{ab} \cdot c_{b,\text{internal}} - \alpha_{ba} \cdot c_{a,\text{internal}} - g/K_a, \quad (\text{S24})$$

$$\frac{dc_{b,\text{internal}}}{dt} = I_b + \alpha_{ba} \cdot c_{a,\text{internal}} - \alpha_{ab} \cdot c_{b,\text{internal}} - g/K_b. \quad (\text{S25})$$

1004  
1005  
1006

A species is defined by its value of  $\vec{\alpha}$ .

1007  
1008  
1009

This metabolic model was used to demonstrate how to obtain locally optimal strategies and cartels, as shown in Fig 5. The parameter values used to generate the plots in Fig 5B-D were:

| $\gamma$ | $K_i (i = a, b)$ | $\beta$ |
|----------|------------------|---------|
| 1        | 1                | 0.2     |

1010  
1011  
1012  
1013  
1014  
1015  
1016  
1017  
1018  
1019  
1020  
1021

In generating Fig 5B, we searched for the maximizing strategies in the nutrient space, and classified them by their non-zero values. Maximal growth contours for four dilution rates: 0.1, 0.2, 0.3, 0.4 are shown from black to gray and white colors.

In generating Fig 5C, the chemostat parameters were set to  $\vec{c}_{\text{supply}} = [0.5, 1]$ , and  $d = 0.2$ . The maximal growth contours for  $d = 0.2$  were drawn, along with maximizing strategies along the contour shown as squares with colors corresponding to their subclasses. At the discontinuous point of the maximal growth contour where the “converter” and the “importer” converge, the distinct two maximizing strategies are denoted species *Red* and species *Blue*. In generating the competition dynamics in inset, additional to the species *Red* and species *Blue*, ten other maximizing strategies along the maximal growth contours were chosen.

1022

### 5. Metabolic model with multiple energy generating steps

1023  
1024  
1025  
1026  
1027  
1028  
1029  
1030  
1031

Cell growth is also tightly coupled with energy production. For example, with a single carbon supply as the energy source, cells employ multi-step reactions to generate multiple ATP molecules. Each step requires dedicated enzymes. The reaction intermediates, such as acetate, usually have dual roles: on the one hand, they positively contribute to ATP production via downstream reactions; on the other hand, they negatively contribute to ATP production by hampering upstream reactions. To deal with the negative effects of intermediates, cells may transport them out into the environment, generally with some metabolic cost for transporters. On the other hand, cells can also uptake such intermediates and use them as an energy source.

1032  
1033  
1034  
1035  
1036  
1037  
1038  
1039

We abstract such a process by the model shown in Fig 6A. A single chemical energy source  $S$  is supplied into the chemostat, which can be converted into intermediate  $I$  by cells. Four reactions are possible in this model, each mediate by a specific enzyme:

1. Import the resource  $S$  into the cell and convert it into internal intermediate  $I_{\text{int}}$  to extract energy (e.g. ATP). The fraction of the model enzyme budget allocated to this reaction is  $\alpha_{\text{ATP1}}$ . We assume the reaction is reversible, with the concentration  $S$  contributing positively to the reaction rate while the concentration  $I_{\text{int}}$  contributes negatively:

$$J_1 = \alpha_{\text{ATP1}} \cdot V_1 \cdot \frac{[S] - \frac{[I_{\text{int}}]}{K_3}}{K_1 + [S] + \frac{[I_{\text{int}}]}{K_5}}. \quad (\text{S26})$$

1040  
1041

2. Process  $I_{\text{int}}$  via a downstream reaction to obtain more energy. The fraction of enzymes being allocated to this reaction is  $\alpha_{\text{ATP2}}$ . For this model system, it does not

1042 qualitatively influence the final results whether this reaction is product inhibited. For  
 1043 simplicity, we assume this reaction has Michaelis–Menten form:

$$J_2 = \alpha_{\text{ATP2}} \cdot V_2 \cdot \frac{[I_{\text{int}}]}{K_2 + [I_{\text{int}}]} \quad (\text{S27})$$

1044 3. Export the internal intermediate out into the environment by diffusion, with a fraction  
 1045 of proteins  $\alpha_{\text{exp}}$  allocated to channels that allow the excretion of the intermediate into  
 1046 the environment to become external intermediate  $I_{\text{ext}}$ .

$$J_3 = \alpha_{\text{exp}} \cdot k \cdot ([I_{\text{int}}] - [I_{\text{ext}}]). \quad (\text{S28})$$

1047 4. Import the external intermediate into cells, with a fraction of proteins  $\alpha_{\text{imp}}$  allocated to  
 1048 the import process. In reflect the property of the internal intermediate in inhibiting this  
 1049 transport reaction, the rate for this process is also product-inhibited:

$$J_4 = \alpha_{\text{imp}} \cdot V_4 \cdot \frac{[I_{\text{ext}}] - \frac{[I_{\text{int}}]}{K_6}}{K_4 + [I_{\text{ext}}] + \frac{[I_{\text{int}}]}{K_7}} \quad (\text{S29})$$

1050 Under this model, the rate of change for the energy source concentration in the  
 1051 chemostat is:

$$\frac{d[S]}{dt} = d \cdot ([S_{\text{supply}}] - [S]) - m/r \cdot J_1 \quad (\text{S30})$$

1052 The rate of change of the external intermediate concentration in the chemostat is:

$$\frac{d[I_{\text{ext}}]}{dt} = d \cdot (-[I_{\text{ext}}]) - m/r \cdot (J_4 - J_3). \quad (\text{S31})$$

1053  
 1054 The concentration for the intercellular metabolite  $I_{\text{int}}$  follows the equation:

$$\frac{d[I_{\text{int}}]}{dt} = J_1 - J_2 - J_3 + J_4. \quad (\text{S32})$$

1055  
 1056 The growth rate is a weighted sum of the ATP produced by  $J_1$  and  $J_2$ :

$$g = n_{\text{ATP1}} \cdot J_1 + n_{\text{ATP2}} \cdot J_2. \quad (\text{S33})$$

1057  
 1058 In generating plots in Fig 6B-F, the species parameters were:

| $V_1$ | $V_2$ | $k$ | $V_4$ | $K_1$ | $K_2$ | $K_3$ | $K_4$ | $K_5$ | $K_6$ | $K_7$ | $n_{\text{ATP1}}$ | $n_{\text{ATP2}}$ |
|-------|-------|-----|-------|-------|-------|-------|-------|-------|-------|-------|-------------------|-------------------|
| 5     | 1     | 8   | 10    | 0.5   | 0.5   | 0.5   | 0.1   | 0.5   | 15    | 10    | 1                 | 1                 |

1059  
 1060 Maximal growth contours for dilution rates 0.2, 0.4, and 0.6 are shown in Fig 6B.

1061 For Fig 6C-D, the chemostat parameters are:  $S_{\text{supply}} = 1, d = 0.4$ .

1062 For Fig 6E-F, the chemostat parameters are:  $S_{\text{supply}} = 1.8, d = 0.6$ .

1063  
 1064 **Dynamic equations for multiple species in a chain of chemostats**

1065 Real ecosystems seldom exist in isolation. We modeled interconnected ecosystems via  
 1066 a chain of chemostats labeled  $k = 1$  to  $k_{\text{tot}}$  (Fig S2A). Each chemostat exchanges  
 1067 medium and cells at leakage rate  $l$  with its two neighboring chemostats (if  $k = 1$  or  $k =$   
 1068  $k_{\text{tot}}$ , there is only one neighbor). The chemostat parameters  $\vec{c}_{\text{supply}}$  and  $d$  are taken to  
 1069 be identical for all chemostats.

1070

1071 For the  $k$ -th chemostat, the dynamical equations for the biomass density of species  $\sigma$   
1072 and the concentration of the  $i$ -th nutrient are:

$$\frac{dm_{\sigma,k}}{dt} = m_{\sigma,k} \cdot (g_{\sigma}(\vec{c}_k) - d) + l \cdot (m_{\sigma,k-1} + m_{\sigma,k+1} - 2 \cdot m_{\sigma,k}), \quad (\text{S34})$$

$$\frac{dc_{i,k}}{dt} = d \cdot (c_{i, \text{supply}} - c_{i,k}) - \sum_{\sigma=1}^n m_{\sigma,k} \cdot I_{i,\sigma}(\vec{c}_k) + l \cdot (c_{i,k+1} + c_{i,k-1} - 2 \cdot c_{i,k}). \quad (\text{S35})$$

1073 A steady-state solution to these equations is shown in Fig S2, using the same growth  
1074 and import models and parameters as in Fig 4, with the leakage rate set to be  $l = 1$ .



1075 **ACKNOWLEDGEMENTS**

1076 We thank Simon Levin for insightful discussions. Zhiyuan Li was supported by Princeton  
1077 Center for Theoretical Science and Center for the Physics of Biological Function. This  
1078 work was supported in part by NSF grant PHY-1607612, the National Science  
1079 Foundation Physics Frontier Center grant through the Center for the Physics of  
1080 Biological Function (PHY-1734030), and National Institutes of Health Grant (R01  
1081 GM082938).  
1082

1083 **COMPETING INTERESTS**

1084 The authors declare that they have no conflict of interest.

1085

1086

1087

1088 **REFERENCES**

- 1089 Ackland, G., & Gallagher, I. (2004). Stabilization of large generalized Lotka-Volterra foodwebs  
1090 by evolutionary feedback. *Physical Review Letters*, *93*(15), 158701.
- 1091 Amarasekare, P. (2003). Competitive coexistence in spatially structured environments: a  
1092 synthesis. *Ecology Letters*, *6*(12), 1109-1122.
- 1093 Armstrong, R. A., & McGehee, R. (1980). Competitive exclusion. *The American Naturalist*,  
1094 *115*(2), 151-170.
- 1095 Bairey, E., Kelsic, E. D., & Kishony, R. (2016). High-order species interactions shape ecosystem  
1096 diversity. *Nat Commun*, *7*, 12285. doi:10.1038/ncomms12285
- 1097 Beardmore, R. E., Gudelj, I., Lipson, D. A., & Hurst, L. D. (2011). Metabolic trade-offs and the  
1098 maintenance of the fittest and the flattest. *Nature*, *472*(7343), 342-346.  
1099 doi:10.1038/nature09905
- 1100 Behar, H., Brenner, N., & Louzoun, Y. (2014). Coexistence of productive and non-productive  
1101 populations by fluctuation-driven spatio-temporal patterns. *Theoretical Population*  
1102 *Biology*, *96*, 20-29.
- 1103 Boer, V. M., Crutchfield, C. A., Bradley, P. H., Botstein, D., & Rabinowitz, J. D. (2010).  
1104 Growth-limiting intracellular metabolites in yeast growing under diverse nutrient  
1105 limitations. *Mol Biol Cell*, *21*(1), 198-211. doi:10.1091/mbc.E09-07-0597
- 1106 Callahan, B. J., Fukami, T., & Fisher, D. S. (2014). Rapid evolution of adaptive niche  
1107 construction in experimental microbial populations. *Evolution*, *68*(11), 3307-3316.  
1108 doi:10.1111/evo.12512
- 1109 Ceballos, G., Ehrlich, P. R., Barnosky, A. D., Garcia, A., Pringle, R. M., & Palmer, T. M.  
1110 (2015). Accelerated modern human-induced species losses: Entering the sixth mass  
1111 extinction. *Sci Adv*, *1*(5), e1400253. doi:10.1126/sciadv.1400253
- 1112 Cermeño, P., Teixeira, I. G., Branco, M., Figueiras, F. G., & Marañón, E. (2014). Sampling the  
1113 limits of species richness in marine phytoplankton communities. *Journal of Plankton*  
1114 *Research*, *36*(4), 1135-1139.
- 1115 Chase, J. M., & Leibold, M. A. (2003). *Ecological niches: linking classical and contemporary*  
1116 *approaches*: University of Chicago Press.
- 1117 D'Souza, G., Shitut, S., Preussger, D., Yousif, G., Waschina, S., & Kost, C. (2018). Ecology and  
1118 evolution of metabolic cross-feeding interactions in bacteria. *Nat Prod Rep*, *35*(5), 455-  
1119 488. doi:10.1039/c8np00009c
- 1120 De Leenheer, P., Levin, S. A., Sontag, E. D., & Klausmeier, C. A. (2006). Global stability in a  
1121 chemostat with multiple nutrients. *Journal of Mathematical Biology*, *52*(4), 419-438.  
1122 doi:10.1007/s00285-005-0344-4
- 1123 de Visser, J., Elena, S. F., Fragata, I., & Matuszewski, S. (2018). The utility of fitness landscapes  
1124 and big data for predicting evolution. *Heredity (Edinb)*, *121*(5), 401-405.  
1125 doi:10.1038/s41437-018-0128-4
- 1126 Descamps-Julien, B., & Gonzalez, A. (2005). Stable coexistence in a fluctuating environment: an  
1127 experimental demonstration. *Ecology*, *86*(10), 2815-2824.
- 1128 Escalante-Chong, R., Savir, Y., Carroll, S. M., Ingraham, J. B., Wang, J., Marx, C. J., &  
1129 Springer, M. (2015). Galactose metabolic genes in yeast respond to a ratio of galactose  
1130 and glucose. *Proc Natl Acad Sci U S A*, *112*(5), 1636-1641.  
1131 doi:10.1073/pnas.1418058112

- 1132 Freilich, S., Zarecki, R., Eilam, O., Segal, E. S., Henry, C. S., Kupiec, M., . . . Ruppin, E. (2011).  
1133 Competitive and cooperative metabolic interactions in bacterial communities. *Nat*  
1134 *Commun*, 2, 589. doi:10.1038/ncomms1597
- 1135 Friedman, J., Higgins, L. M., & Gore, J. (2017). Community structure follows simple assembly  
1136 rules in microbial microcosms. *Nature ecology & evolution*, 1(5), 0109.
- 1137 Geyrhofer, L., & Brenner, N. (2018). Coexistence and cooperation in structured habitats.  
1138 *BioRxiv*, 429605.
- 1139 Goldford, J. E., Lu, N., Bajić, D., Estrela, S., Tikhonov, M., Sanchez-Gorostiaga, A., . . .  
1140 Sanchez, A. (2018). Emergent simplicity in microbial community assembly. *Science*,  
1141 361(6401), 469-474.
- 1142 Goyal, A., Dubinkina, V., & Maslov, S. (2018). Multiple stable states in microbial communities  
1143 explained by the stable marriage problem. *The ISME Journal*. doi:10.1038/s41396-018-  
1144 0222-x
- 1145 Goyal, S., Yuan, J., Chen, T., Rabinowitz, J. D., & Wingreen, N. S. (2010). Achieving optimal  
1146 growth through product feedback inhibition in metabolism. *PLoS computational biology*,  
1147 6(6), e1000802.
- 1148 Hardin, G. (1960). The competitive exclusion principle. *Science*, 131(3409), 1292-1297.
- 1149 Huisman, J., Johansson, A. M., Folmer, E. O., & Weissing, F. J. (2001). Towards a solution of  
1150 the plankton paradox: the importance of physiology and life history. *Ecology Letters*,  
1151 4(5), 408-411.
- 1152 Huisman, J., van Oostveen, P., & Weissing, F. J. (1999). Species dynamics in phytoplankton  
1153 blooms: incomplete mixing and competition for light. *The American Naturalist*, 154(1),  
1154 46-68.
- 1155 Huisman, J., & Weissing, F. J. (1999). Biodiversity of plankton by species oscillations and  
1156 chaos. *Nature*, 402(6760), 407-410. doi:10.1038/46540
- 1157 Huisman, J., & Weissing, F. J. (2001). Biological conditions for oscillations and chaos generated  
1158 by multispecies competition. *Ecology*, 82(10), 2682-2695.
- 1159 Hutchinson, G. E. (1961). The paradox of the plankton. *The American Naturalist*, 95(882), 137-  
1160 145.
- 1161 Kasting, J. F., & Siefert, J. L. (2002). Life and the evolution of Earth's atmosphere. *Science*,  
1162 296(5570), 1066-1068. doi:10.1126/science.1071184
- 1163 Kerr, B., Riley, M. A., Feldman, M. W., & Bohannan, B. J. M. (2002). Local dispersal promotes  
1164 biodiversity in a real-life game of rock–paper–scissors. *Nature*, 418(6894), 171.
- 1165 Koffel, T., Daufresne, T., Massol, F., & Klausmeier, C. A. (2016). Geometrical envelopes:  
1166 Extending graphical contemporary niche theory to communities and eco-evolutionary  
1167 dynamics. *Journal of Theoretical Biology*, 407, 271-289.
- 1168 Laland, K., Matthews, B., & Feldman, M. W. (2016). An introduction to niche construction  
1169 theory. *Evol Ecol*, 30, 191-202. doi:10.1007/s10682-016-9821-z
- 1170 Leibold, M. A. (1995). The Niche Concept Revisited: Mechanistic Models and Community  
1171 Context. *Ecology*, 76(5), 1371-1382. doi:10.2307/1938141
- 1172 Letten, A. D., Ke, P. J., & Fukami, T. (2017). Linking modern coexistence theory and  
1173 contemporary niche theory. *Ecological Monographs*, 87(2), 161-177.  
1174 doi:10.1002/ecm.1242
- 1175 Levin, S. A. (1970). Community equilibria and stability, and an extension of the competitive  
1176 exclusion principle. *The American Naturalist*, 104(939), 413-423.

- 1177 Li, S. H.-J., Li, Z., Park, J. O., King, C. G., Rabinowitz, J. D., Wingreen, N. S., & Gitai, Z.  
1178 (2018). Escherichia coli translation strategies differ across carbon, nitrogen and  
1179 phosphorus limitation conditions. *Nature microbiology*, 3(8), 939.
- 1180 Liebermeister, W., Noor, E., Flamholz, A., Davidi, D., Bernhardt, J., & Milo, R. (2014). Visual  
1181 account of protein investment in cellular functions. *Proceedings of the National Academy  
1182 of Sciences*, 111(23), 8488-8493.
- 1183 Luli, G. W., & Strohl, W. R. (1990). Comparison of growth, acetate production, and acetate  
1184 inhibition of Escherichia coli strains in batch and fed-batch fermentations. *Applied and  
1185 environmental microbiology*, 56(4), 1004-1011.
- 1186 MacArthur, R. (1970). Species packing and competitive equilibrium for many species.  
1187 *Theoretical Population Biology*, 1(1), 1-11.
- 1188 Maharjan, R., Seeto, S., Notley-McRobb, L., & Ferenci, T. (2006). Clonal adaptive radiation in a  
1189 constant environment. *Science*, 313(5786), 514-517. doi:10.1126/science.1129865
- 1190 Marsland III, R., Cui, W., & Mehta, P. (2019). The Minimum Environmental Perturbation  
1191 Principle: A New Perspective on Niche Theory. *arXiv preprint arXiv:1901.09673*.
- 1192 McGehee, R., & Armstrong, R. A. (1977). Some mathematical problems concerning the  
1193 ecological principle of competitive exclusion. *Journal of Differential Equations*, 23(1),  
1194 30-52.
- 1195 Moore, C., Mills, M., Arrigo, K., Berman-Frank, I., Bopp, L., Boyd, P., . . . Jaccard, S. (2013).  
1196 Processes and patterns of oceanic nutrient limitation. *Nature Geoscience*, 6(9), 701.
- 1197 Murdoch, W. W., & Oaten, A. (1975). Predation and population stability.
- 1198 Mustonen, V., & Lässig, M. (2009). From fitness landscapes to seascapes: non-equilibrium  
1199 dynamics of selection and adaptation. *Trends in Genetics*, 25(3), 111-119.  
1200 doi:10.1016/j.tig.2009.01.002
- 1201 Odling-Smee, F. J., Laland, K. N., & Feldman, M. W. (2003). *Niche construction: the neglected  
1202 process in evolution*: Princeton university press.
- 1203 Odum, E. P., & Barrett, G. W. (1971). *Fundamentals of ecology* (Vol. 3): Saunders Philadelphia.
- 1204 Palmer, M. W. (1994). Variation in species richness: Towards a unification of hypotheses. *Folia  
1205 Geobotanica et Phytotaxonomica*, 29(4), 511-530. doi:10.1007/BF02883148
- 1206 Pfeiffer, T., & Bonhoeffer, S. (2004). Evolution of cross-feeding in microbial populations. *The  
1207 American Naturalist*, 163(6), E126-E135.
- 1208 Posfai, A., Taillefumier, T., & Wingreen, N. S. (2017). Metabolic Trade-Offs Promote Diversity  
1209 in a Model Ecosystem. *Physical Review Letters*, 118(2).  
1210 doi:10.1103/PhysRevLett.118.028103
- 1211 Rosenzweig, R. F., Sharp, R., Treves, D. S., & Adams, J. (1994). Microbial evolution in a simple  
1212 unstructured environment: genetic differentiation in Escherichia coli. *Genetics*, 137(4),  
1213 903-917.
- 1214 Roy, S., & Chattopadhyay, J. (2007). Towards a resolution of 'the paradox of the plankton': A  
1215 brief overview of the proposed mechanisms. *Ecological complexity*, 4(1-2), 26-33.
- 1216 Scheffer, M., Rinaldi, S., Huisman, J., & Weissing, F. J. (2003). Why plankton communities  
1217 have no equilibrium: solutions to the paradox. *Hydrobiologia*, 491(1-3), 9-18.
- 1218 Schirmer, B. E., de Vos, J. M., Antonelli, A., & Bagheri, H. C. (2013). Evolution of  
1219 multicellularity coincided with increased diversification of cyanobacteria and the Great  
1220 Oxidation Event. *Proc Natl Acad Sci U S A*, 110(5), 1791-1796.  
1221 doi:10.1073/pnas.1209927110



- 1222 Smith, H. L., & Waltman, P. (1995). *The theory of the chemostat: dynamics of microbial*  
1223 *competition* (Vol. 13): Cambridge university press.
- 1224 Soliveres, S., Maestre, F. T., Ulrich, W., Manning, P., Boch, S., Bowker, M. A., . . . Allan, E.  
1225 (2015). Intransitive competition is widespread in plant communities and maintains their  
1226 species richness. *Ecology Letters*, *18*(8), 790-798. doi:10.1111/ele.12456
- 1227 Taillefumier, T., Posfai, A., Meir, Y., & Wingreen, N. S. (2017). Microbial consortia at steady  
1228 supply. *eLife*, *6*, e22644.
- 1229 Tilman, D. (1980). Resources: a graphical-mechanistic approach to competition and predation.  
1230 *The American Naturalist*, *116*(3), 362-393.
- 1231 Tilman, D. (1982). *Resource competition and community structure*: Princeton university press.
- 1232 Tilman, D. (1994). Competition and Biodiversity in Spatially Structured Habitats. *Ecology*,  
1233 *75*(1), 2-16. doi:Doi 10.2307/1939377
- 1234 Van den Bergh, B., Swings, T., Fauvart, M., & Michiels, J. (2018). Experimental design,  
1235 population dynamics, and diversity in microbial experimental evolution. *Microbiol. Mol.*  
1236 *Biol. Rev.*, *82*(3), e00008-00018.
- 1237 Venturelli, O. S., Carr, A. C., Fisher, G., Hsu, R. H., Lau, R., Bowen, B. P., . . . Arkin, A. P.  
1238 (2018). Deciphering microbial interactions in synthetic human gut microbiome  
1239 communities. *Mol Syst Biol*, *14*(6), e8157. doi:10.15252/msb.20178157
- 1240 Wang, X., & Tang, C. (2017). Optimal growth of microbes on mixed carbon sources. *arXiv*  
1241 *preprint arXiv:1703.08791*.
- 1242 Wides, A., & Milo, R. (2018). Understanding the dynamics and optimizing the performance of  
1243 chemostat selection experiments. *arXiv preprint arXiv:1806.00272*.
- 1244 Wintermute, E. H., & Silver, P. A. (2010). Emergent cooperation in microbial metabolism. *Mol*  
1245 *Syst Biol*, *6*, 407. doi:10.1038/msb.2010.66
- 1246 Wright, S. (1932). *The roles of mutation, inbreeding, crossbreeding, and selection in evolution*  
1247 (Vol. 1): na.
- 1248 Zhang, X. S. (2012). Fisher's geometrical model of fitness landscape and variance in fitness  
1249 within a changing environment. *Evolution: International Journal of Organic Evolution*,  
1250 *66*(8), 2350-2368.
- 1251 Ziv, N., Brandt, N. J., & Gresham, D. (2013). The Use of Chemostats in Microbial Systems  
1252 *Biology. Jove-Journal of Visualized Experiments*(80). doi:UNSP e50168  
1253 10.3791/50168  
1254  
1255

1256 **FIGURES**

Figure 1

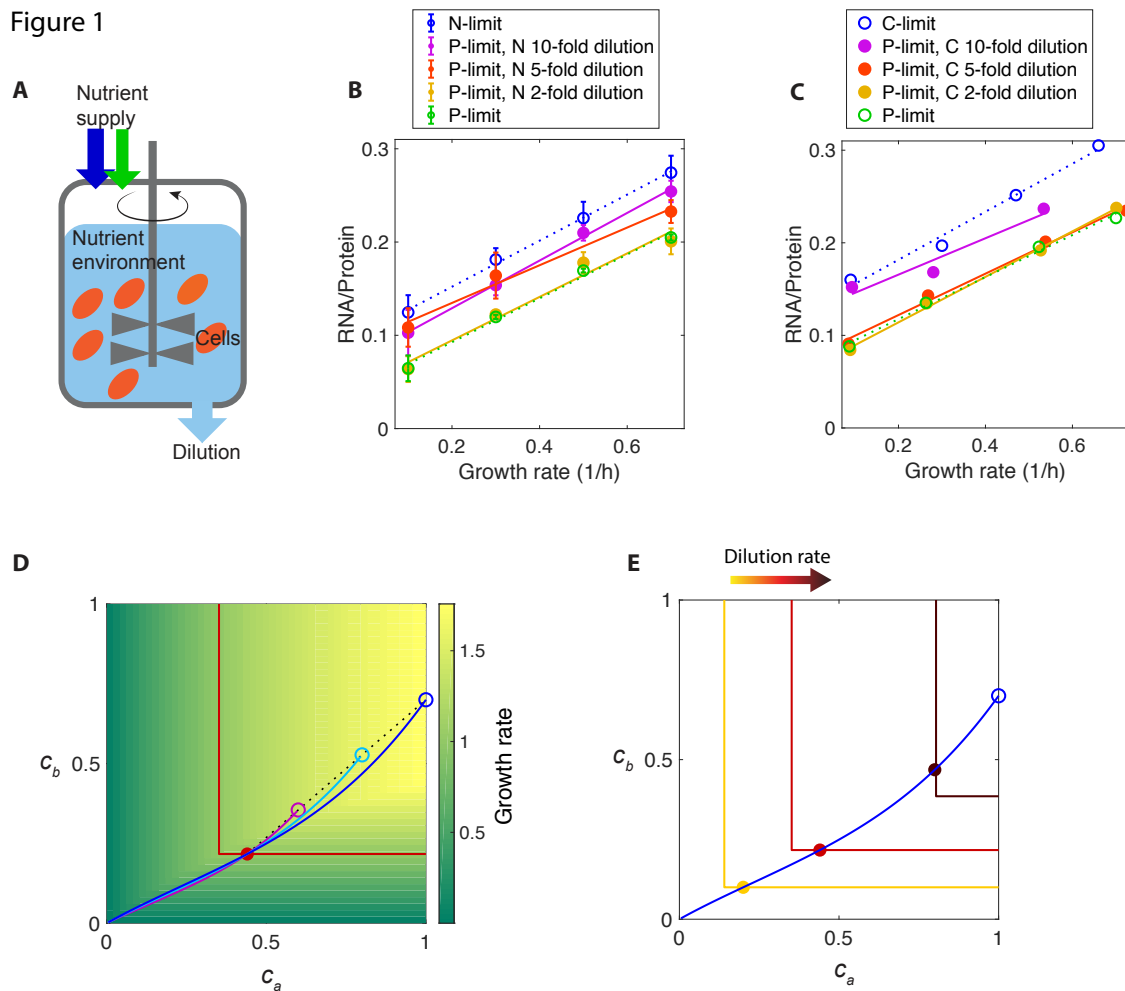

1257  
1258  
1259  
1260  
1261

**Figure 1 - Chemostat behavior can be represented in the space of nutrient concentrations.**

1262 A. Schematic diagram of a chemostat occupied by a single microbial species. In the  
1263 well-mixed medium (pale blue) of a chemostat, cells (orange ellipses) consume  
1264 nutrients and grow. An influx of nutrients with fixed concentrations (blue and green  
1265 arrows) is supplied at the same rate as dilution, keeping the medium volume constant.  
1266

1267 B. Nutrient supply shifts the relationship between RNA/Protein ratio and growth rate of  
1268 *E. coli* cultured in chemostats from phosphorus limitation (P-limited, green open circles  
1269 and dotted line) to nitrogen limitation (N-limited, blue open circles and dotted line). Data  
1270 for dilution of supplied nitrogen by 2, 5, and 10-fold starting from the P-limited condition  
1271 are shown as solid dots and corresponding best-fit lines. Each measurement was  
1272 repeated three times and standard errors are shown by bars.  
1273

1274 C. Same as (B), but for phosphorus and carbon limitation instead of phosphorus and  
1275 nitrogen limitation. Data for dilution of supplied carbon by 2, 5, and 10-fold starting from  
1276 the P-limited condition are shown as solid dots and corresponding best-fit lines.

1277  
1278 D. Visual representation of how a species creates its own chemostat environment.  
1279 Background color indicates the growth rate of cells as a function of nutrient  
1280 concentrations  $c_a$  and  $c_b$ , with the growth contour shown by the red curve. The supply  
1281 line for the steady-state environment (purple dot) is shown as a dotted black line.  
1282 Different supply concentrations ( $c_{a,\text{supply}}$  and  $c_{b,\text{supply}}$ ) along the supply line are marked by  
1283 purple, cyan, and blue circles, with the corresponding flux-balance curves shown in the  
1284 same colors.

1285  
1286 E. Dilution rate can flip nutrient limitation. The external supply condition is marked by a  
1287 blue circle, and the flux-balance curve for this supply is shown in the same color. Three  
1288 growth contours with increasing dilution rates are shown from yellow to deep red, and  
1289 the corresponding steady-state environments are shown in colored dots.

1290

1291

1292

Figure 2

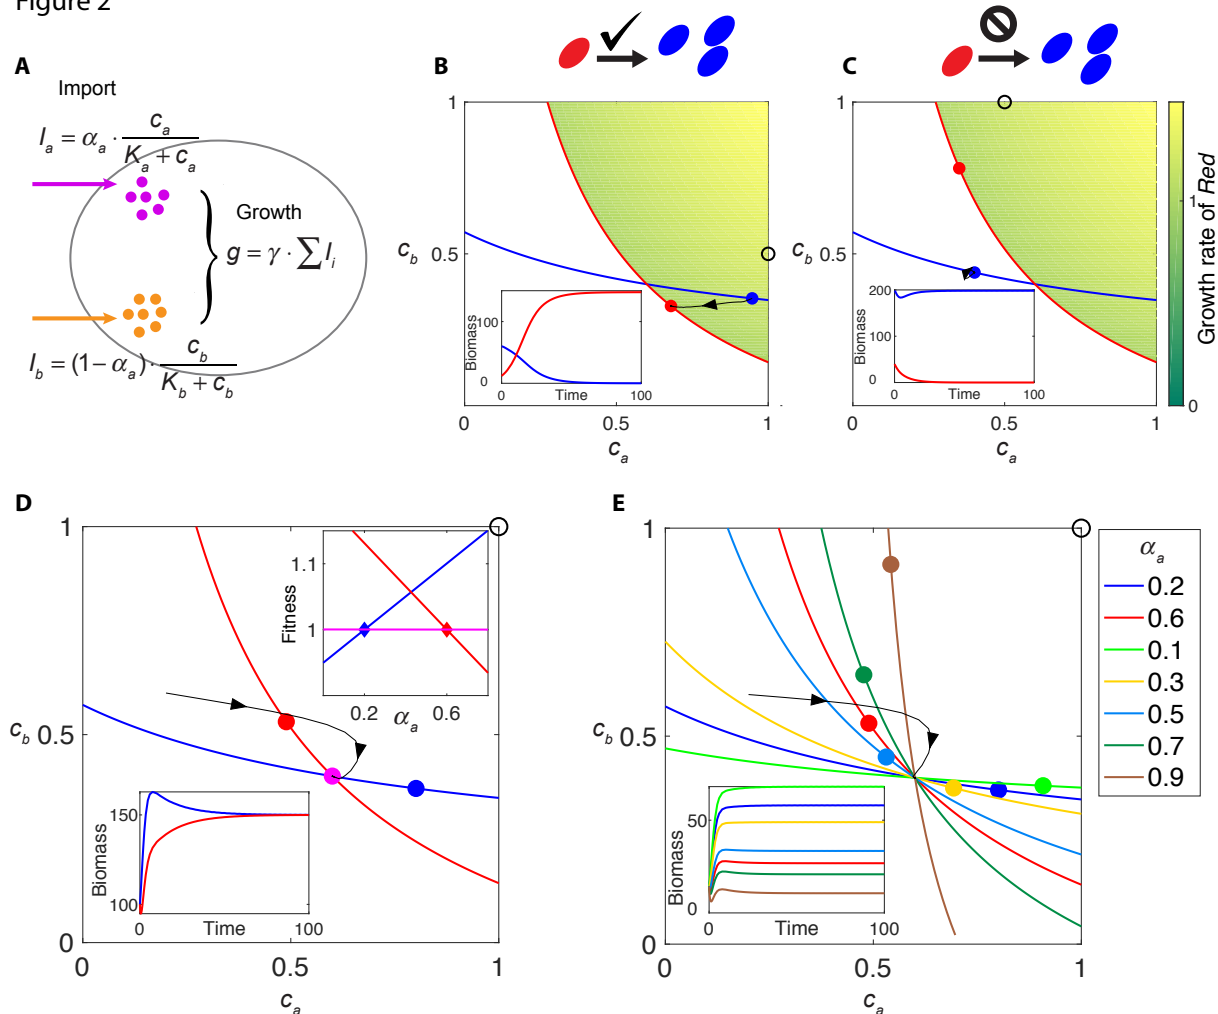

1293  
 1294  
 1295

**Figure 2 – Invasion and coexistence in a chemostat.**

1296 A. Example of a metabolic model with a trade-off in allocation of resources for import of  
 1297 two substitutable nutrients, with both nutrients contributing additively to growth. Species  
 1298 *Red* and species *Blue* allocate resources differently (indicated by parameter  $\alpha_a$ , see  
 1299 Methods).

1300  
 1301 B. Example of successful invasion of species *Blue* by species *Red*. A small amount of  
 1302 species *Red* is introduced to a steady-state chemostat of species *Blue*. Growth contours  
 1303 and steady-state environments of species *Blue* and species *Red* are shown as curves  
 1304 and dots in the corresponding colors (colored background indicates the “invasion zone”  
 1305 of *Red*, and represents the growth rate of *Red* in this zone). The supply condition is  
 1306 marked by black circle. Black curves with arrows show the time trajectory of the  
 1307 invasion in nutrient space. Inset: biomass of species in chemostat over time course of  
 1308 invasion.

1309

1310 C. Same as (B), except that because the supply condition (black circle) is different, the  
1311 attempted invasion by species *Red* is unsuccessful.

1312  
1313 D. Growth contours and the steady-state environments created by *Red* or *Blue* alone,  
1314 under the supply condition shown by the black circle. Black curve with arrows shows a  
1315 trajectory in nutrient space. Purple dot indicates the steady-state environment created  
1316 by *Red* and *Blue* together. Lower inset: time course of species biomass. Upper inset:  
1317 the fitness landscape created by *Red* alone (color red, with the strategy of *Red* marked  
1318 by red diamond), created by *Blue* alone (color blue, with the strategy of *Blue* marked by  
1319 blue diamond), and created by both species (color purple). The colors correspond to the  
1320 steady-state environments shown by colored dots in (D).

1321  
1322 E. Growth contours and the species-specific steady-state environments for seven  
1323 different species alone, under the supply condition shown by the black circle. Black  
1324 curve with arrows shows a trajectory in nutrient space. Lower inset: time course of  
1325 species biomass.

1326



Figure 3

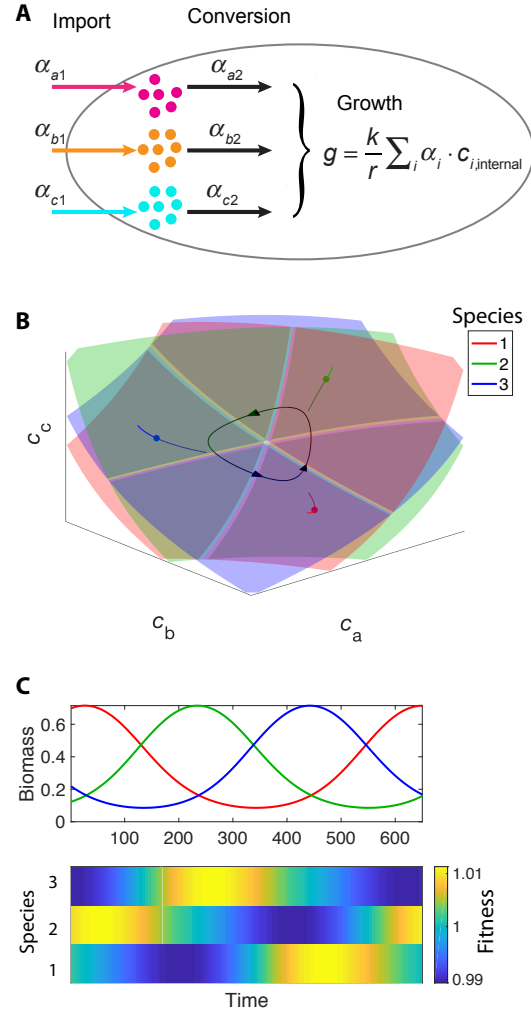

1327  
1328 **Figure 3 - Rock-paper-scissors oscillations.**

1329  
1330 A. Example of a metabolic model with a trade-off in allocation of resources for importing  
1331 of three substitutable nutrients and assimilating them into biomass, with all three  
1332 nutrients contributing additively to growth. Species *Red*, species *Blue*, and species  
1333 *Green* allocate resources differently (see Methods).

1334  
1335 B. Growth contours (surfaces), flux-balance curves (lines), and steady-state nutrient  
1336 concentrations (dots) for the three species in a three-dimensional nutrient space. Black  
1337 curves with arrows show the system's limit-cycle trajectory.

1338  
1339 C. The top panel shows the time course of species biomass for the limit cycle in (B).  
1340 The bottom panel shows how the fitness landscape changes with time over one period  
1341 of the oscillation.

1342  
1343

Figure 4

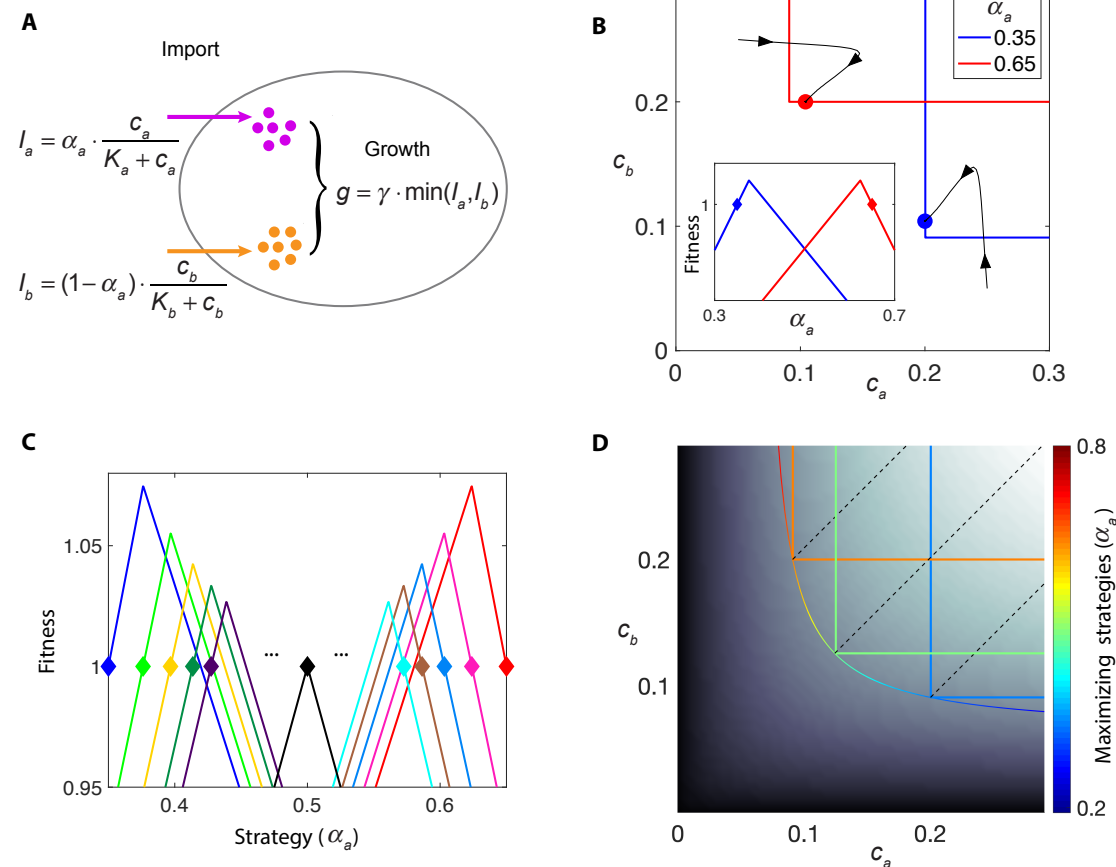

1344  
1345  
1346  
1347  
1348  
1349  
1350  
1351  
1352  
1353  
1354  
1355  
1356  
1357  
1358  
1359  
1360  
1361  
1362  
1363  
1364

**Figure 4 – Multi-stability, chain of invasion, and non-invasible strategy.**

A. Example of bistability for a metabolic model with a trade-off in allocation of resources for import of two essential nutrients, with the lower of the two import rates determining growth rate. Species *Red* and species *Blue* allocate resources differently (indicated by parameter  $\alpha_a$ , see Methods).

B. Bistability of the system in (A) shown in nutrient space. Black curves with arrows show the trajectories of simulations with different initial conditions. Inset: the fitness landscape created by species *Red* or *Blue* alone, with colors corresponding to the steady-state environments shown by colored dots in (B).

C. A chain of invasion. Fitness landscape created by species with different resource allocation strategies (marked by diamond shapes). Starting from species *Blue*, the species having the highest growth rate in the fitness landscape created by the “former” species is chosen. This creates a chain of invasion from *Blue* to *Light Green*, *Yellow*, *Deep Green*, *Deep Purple*, all the way (intermediate processes omitted) to the species *Black*, which places itself on the peak of its fitness landscape. The same procedure is also performed starting with species *Red*.

1365 D. Depiction of non-invasible strategies under different supply conditions. Black-white  
1366 background indicates the maximal growth rate of model in (A) under each environment,  
1367 and the contour of maximal growth rates contains different strategies (represented by  
1368 red-to-blue color). Growth contours of three species adopting one of the “maximizing  
1369 strategies” are colored by their strategies. The supply conditions allowing these  
1370 strategies to be “non-invasible” are marked by dashed black lines.  
1371  
1372  
1373

Figure 5

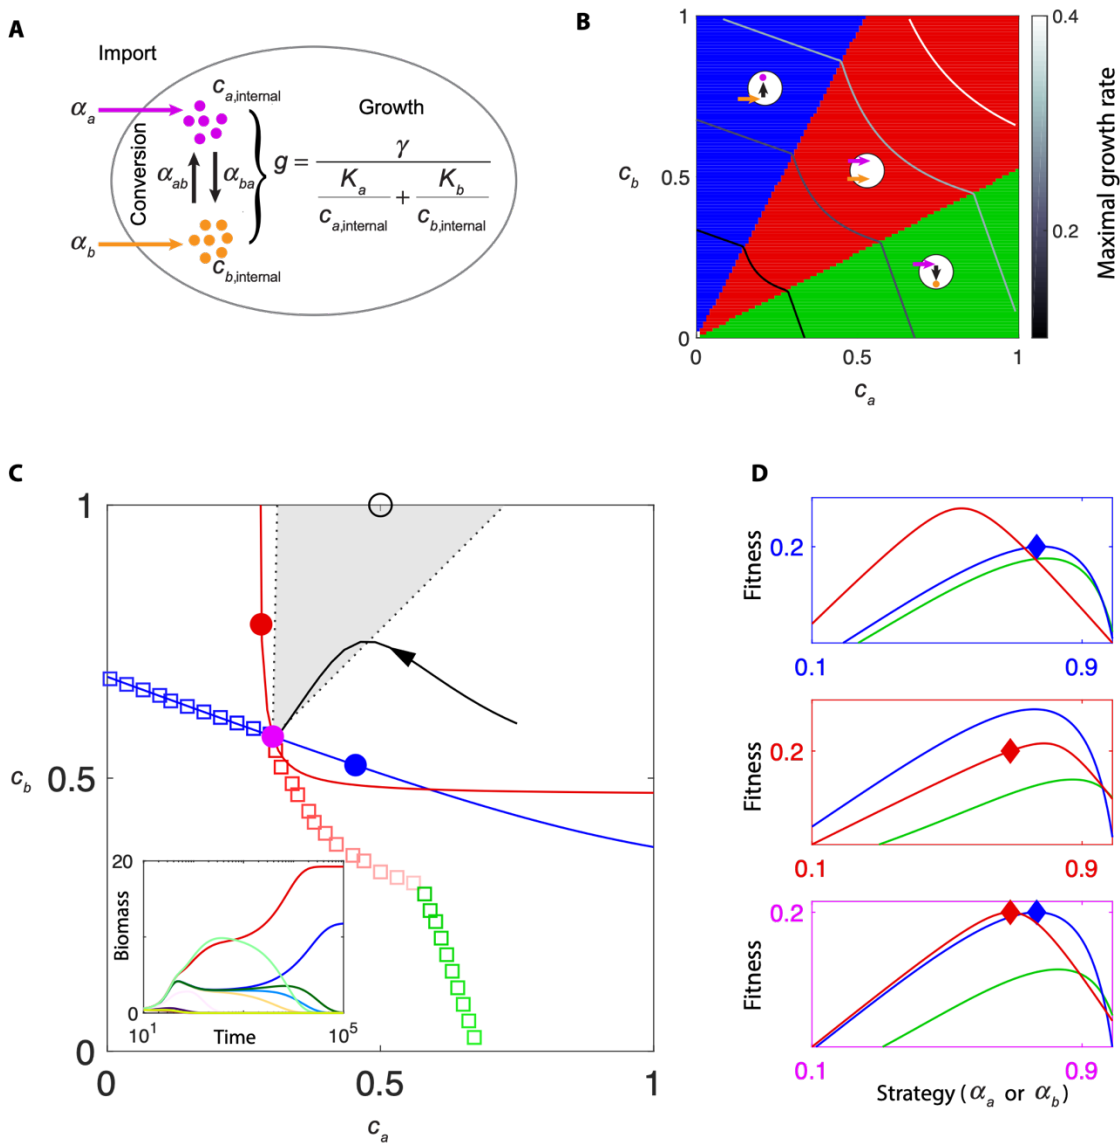

1374

1375

1376

**Figure 5 - Non-invisible cartels.**

1377

A. Metabolic model with a trade-off in allocation of resources for import of two nutrients plus their interconversion, with both nutrients necessary for growth.

1380

B. Three subclasses of maximizing metabolic strategies in nutrient space are indicated by background color, and circles with arrows illustrate the metabolic strategies of each subclass. The maximal growth contours for four growth rates (0.1, 0.2, 0.3, 0.4) are marked by gray colors.

1385

C. Two maximizing strategies co-creating a non-invisible steady state. At dilution rate 0.2, the maximal growth contour and the corresponding maximizing strategies are shown as colored squares. At a discontinuous point of the growth contour, the supply

1386

1387

1388

1389 lines of two distinct metabolic strategies (*Red* and *Blue*) span a gray region, where any  
1390 supply condition (e.g. black circle) requires the two maximizing strategies to co-create  
1391 the environment on the discontinuous point. Red and blue dots mark the environments  
1392 created by species *Red* and species *Blue* alone, and the purple dot marks the  
1393 environment co-created by *Red* and *Blue*. Black curve with arrows shows a trajectory in  
1394 nutrient space. Inset is the competition dynamics of the species *Red* and species *Blue*  
1395 together with 10 other maximizing species with different strategies.

1396

1397 D. The fitness landscapes for the three environments in (C) indicated by corresponding  
1398 box colors. For class Green and Red, the strategy is represented by  $\alpha_a$ , for class Blue,  
1399 the strategy is represented by  $\alpha_b$ .

1400

Figure 6

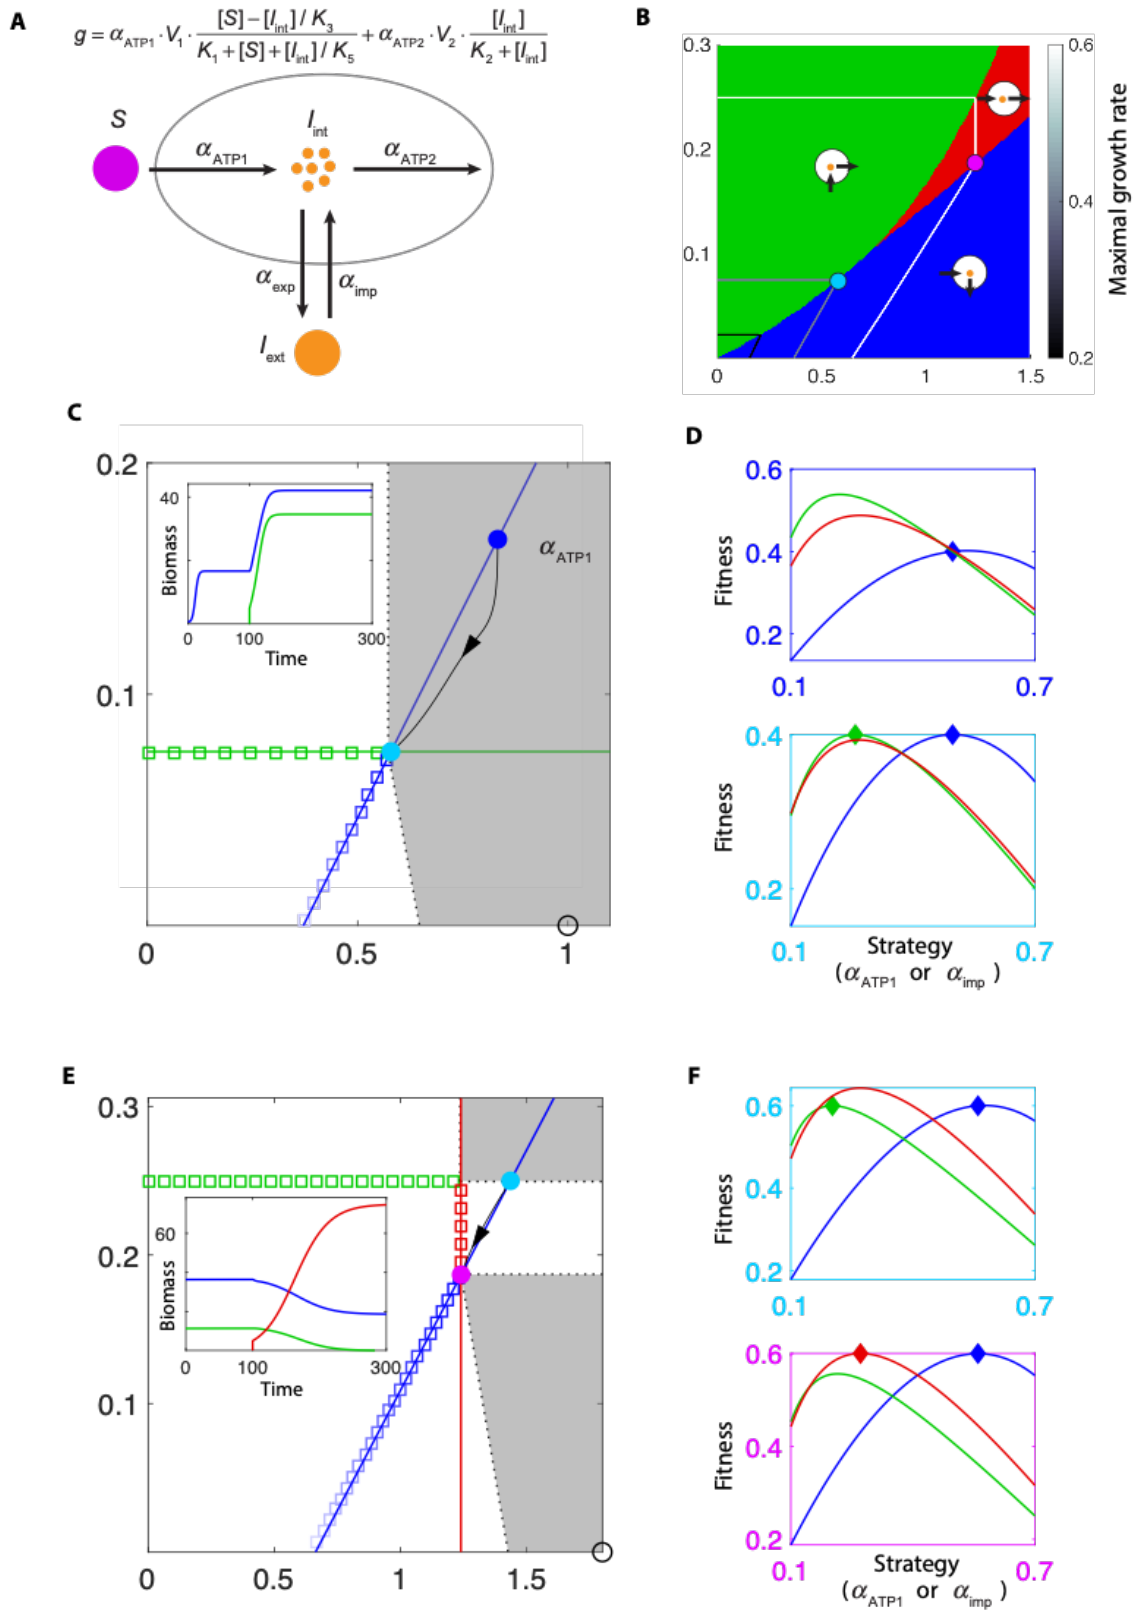



1402 **Figure 6 – Species creating new nutrient dimensions and achieving evolutionarily**  
1403 **stable coexistence.**

1404

1405 A. Metabolic model with a single supplied nutrient  $S$ . Cells allocate enzymes to convert  
1406  $S$  into internal intermediate  $I_{\text{int}}$  and produce energy (denoted as “ATP”), export internal  
1407 intermediate into the chemostat to become  $I_{\text{ext}}$ , import external intermediate, or  
1408 consume  $I_{\text{int}}$  to produce ATP. The growth rate is the sum of ATP production (see  
1409 Methods).

1410

1411 B. Three subclasses of maximizing metabolic strategies in nutrient space are indicated  
1412 by background color, and circles with arrows illustrate the metabolic strategies of each  
1413 subclass. The maximal growth contours for three growth rates (0.2, 0.4, 0.6) are marked  
1414 by black-to-white colors.

1415

1416 C. At dilution rate 0.4, two maximizing strategies co-create a non-invasible environment.  
1417 The maximal growth contour and the corresponding maximizing strategies are shown as  
1418 colored squares. At a discontinuous point of the growth contour, the supply lines of two  
1419 distinct metabolic strategies (*Green* and *Blue*) span a gray region, where any supply  
1420 condition (e.g. black circle) requires two maximizing strategies to co-create the  
1421 environment at the discontinuous point. Blue dot marks the environment created by  
1422 species *Blue* alone, and the cyan dot marks the environment co-created by *Blue* and  
1423 *Green*. Black curve with arrows shows a trajectory in nutrient space. Inset shows the  
1424 time course of species biomass, with species *Green* added to the chemostat at time  
1425 100.

1426

1427 D. The fitness landscapes for two environments in (C) indicated by corresponding box  
1428 colors, reflecting the relationship between instantaneous growth rate and resource  
1429 allocation strategy. For class *Blue* and *Red*, the strategy is represented by  $\alpha_{\text{ATP1}}$ ; for  
1430 class *Green* the strategy is represented by  $\alpha_{\text{imp}}$ .

1431

1432 E. Same as (C), except that the dilution rate is 0.6, and the inset shows the time course  
1433 of species biomass, starting with *Blue* and *Green*, with species *Red* added to the  
1434 chemostat at time 100.

1435

1436 D. Same as (D), except that it is for the two steady-state environments shown in (E).

1437

1438

1439 **SUPPLEMENTAL FIGURES**

1440

Figure S1

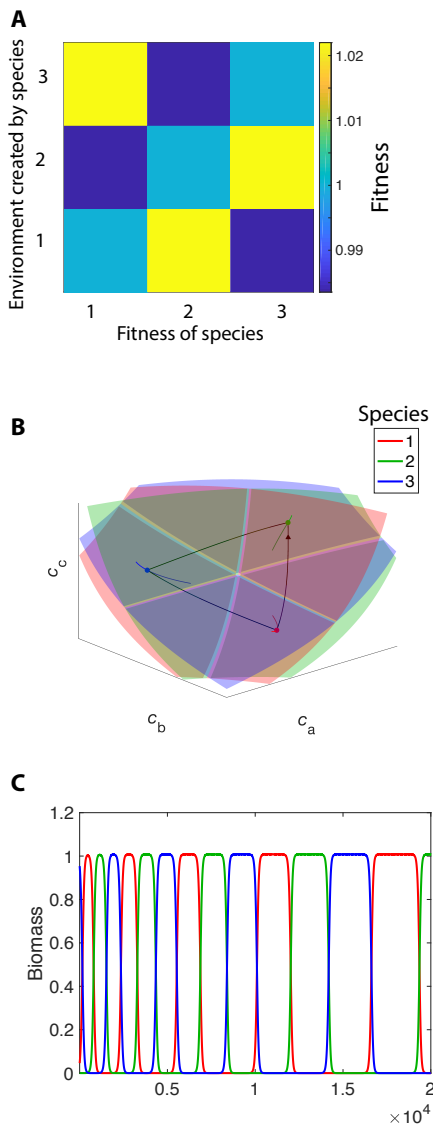

1441

1442

### Figure S1- Rock-paper-scissor fitness landscape and heteroclinic cycle

1443

1444 A. The fitness of Species 1, 2, and 3 in the steady-state environment constructed by

1445 species 1, 2, and 3 for the model in Fig 3.

1446

1447 B. Growth contours (surfaces), flux-balance curves (lines), and steady-state nutrient

1448 concentrations (dots) for three species in a three-dimensional nutrient space, with a

1449 different conversion speed ( $k = 10$ ) than in Fig. 3 ( $k = 1$ ) (see Methods). Black curves

1450 with arrows show the system's oscillatory trajectory.

1451

1452 C. The top panel shows the time course of species biomass for the limit cycle in (B).

1453 The bottom panel shows how the fitness landscape changes with time.

1454

1455 D. Time course of species biomass over a long duration.

Figure S2

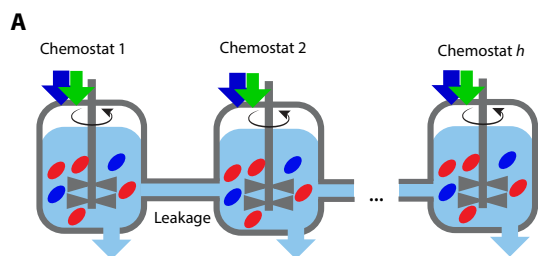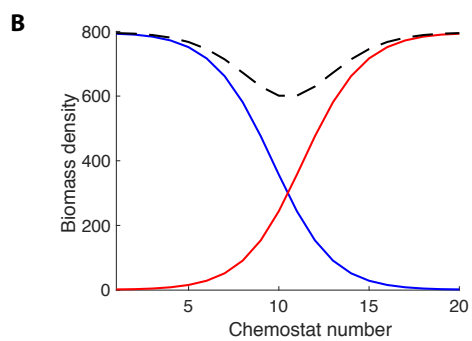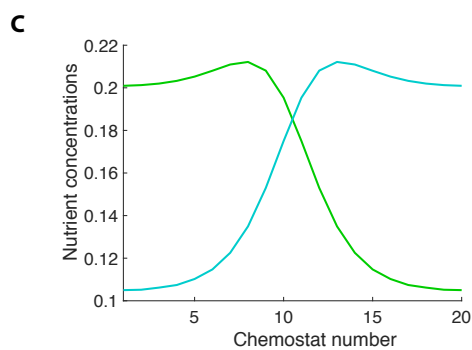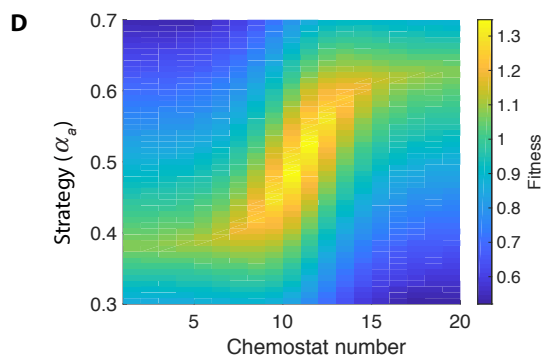

1457 **Figure S2- Steady-state spatial heterogeneity for linked chemostats.**

1458

1459 With initial seeding of two species, one at each of the two ends of a chain of  
1460 chemostats, a steady-state gradient of species biomass density spontaneously emerges  
1461 accompanied by a gradient of nutrient concentrations, even though the supply  
1462 conditions and dilution rates are identical for all the chemostats.

1463

1464 A. Schematic of  $k_{\text{tot}}$  linked chemostats exchanging medium and cells via leakage,  
1465 described by Eqs. S34-S35. The two species in the chemostats (*Blue* and *Red*) are the  
1466 same bistable pair as in Fig 4B and the leakage rate is  $l = 1$ .

1467

1468 B. The species composition along 20 linked chemostats for the system in (A). Species  
1469 colors correspond to those in Fig 4B, with species *Blue* having  $\alpha_a = 0.35$ , species *Red*  
1470 having  $\alpha_a = 0.65$ . The dashed black curve shows the sum of the two biomass densities.  
1471 The initial condition was cell-free chemostats with a small amount of *Blue* added to  
1472 Chemostat 1 and small amount of *Red* added to Chemostat 20.

1473

1474 C. Concentrations along the 20 chemostats for nutrient *a* (green) and nutrient *b* (cyan)  
1475 for system in (A).

1476

1477 D. The fitness landscape along the chain of chemostats. The x-axis is the 20 linked  
1478 chemostats, and the y-axis is the metabolic strategy represented by  $\alpha_a$ . Color indicates  
1479 the growth rate of species adopting the given strategy in the  $k$ -th chemostat.

1480

1481

Figure S3

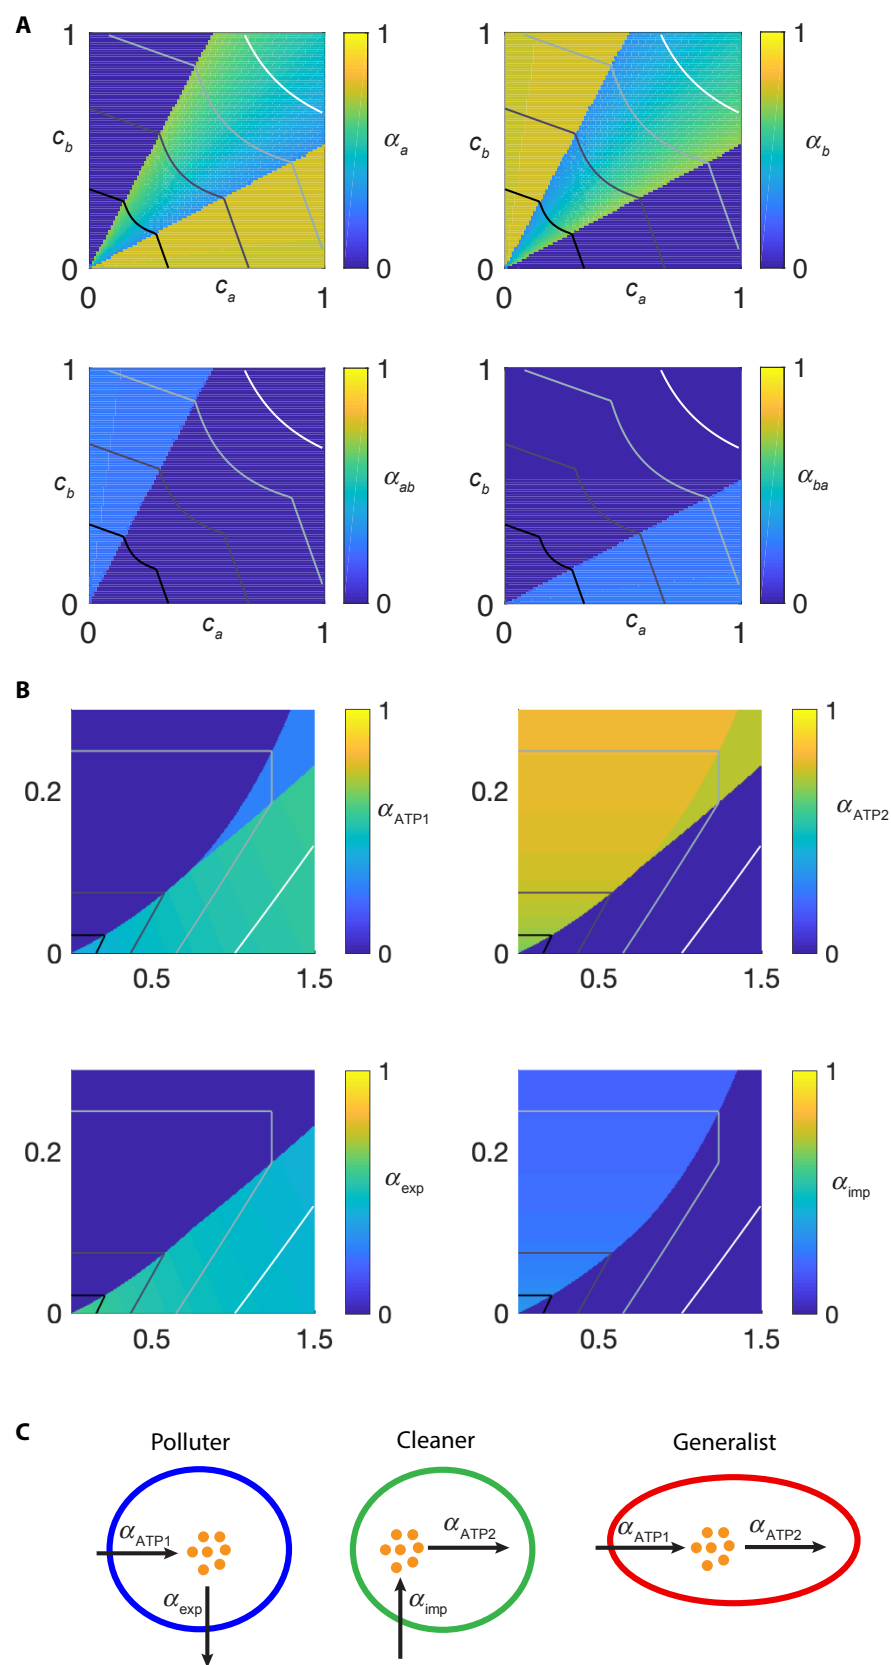



1483 **Figure S3 – Maximizing strategies in nutrient space.**

1484

1485 A. For each environment in the nutrient space, the maximizing resource allocation  
1486 strategies that maximizes growth rates for the model in Fig 5A. Each strategy is  
1487 represented by the four elements  $[\alpha_a, \alpha_b, \alpha_{ab}, \alpha_{ba}]$ , and values for each element are  
1488 shown by a heatmap. Black-to-white curves are the maximal growth contours for  $d =$   
1489 0.1, 0.2, 0.3, 0.4.

1490

1491 B. For each environment in the nutrient space, the maximizing resource allocation  
1492 strategies that maximizes growth rates for the model in Fig 6A. Each strategy is  
1493 represented by the four elements  $[\alpha_{ATP1}, \alpha_{ATP2}, \alpha_{exp}, \alpha_{imp}]$ , and values for each  
1494 element are shown by a heatmap. Black-to-white curves are the maximal growth  
1495 contours for  $d = 0.2, 0.4, 0.6$ .

1496

1497 C. Schematic representations of the three classes of maximizing strategies appearing in  
1498 (B).

1499
